# Supplementary material for: Occurrence, spatiotemporal distribution, mass balance and ecological risks of antibiotics in subtropical shallow Lake Taihu, China
Source: Royal Society of Chemistry journal article supplement (doi:10.1039/c6em00062b), 2016-01-01
Supplement: c6em00062b1.pdf [file c6em00062b1.pdf]

1  
2  
3  
4  
5  
6  
7  
8  
9  
10  
11  
12  
13  
14  
15  
16  
17  
18  
19  
20  
21  
22

**Supplementary information**

**Occurrence, spatiotemporal distribution, mass balance and ecological risks of  
antibiotics in the subtropical shallow Lake Taihu, China**

*Li-Jun Zhou<sup>a,\*</sup>, Qinglong L. Wu<sup>a,b,\*</sup>, Bei-Bei Zhang<sup>c</sup>, Yong-Gang Zhao<sup>c</sup>, Bi-Ying  
Zhao<sup>a</sup>*

*<sup>a</sup> State Key Laboratory of Lake Science and Environment, Nanjing Institute of  
Geography and Limnology, Chinese Academy of Sciences, Nanjing, China*

*<sup>b</sup> Sino-Danish Center for Education and Science, University of Chinese Academy of  
Sciences*

*<sup>c</sup> State Environmental Protection Key Laboratory of Monitoring and Analysis for  
Organic Pollutants in Surface Water, Jiangsu Provincial Environmental Monitoring  
Center, Nanjing, China*

*\* Corresponding author. Phone: +86 25 86882107. E-mail address: [qlwu@niglas.ac.cn](mailto:qlwu@niglas.ac.cn)  
or Phone: +86 25 86882240. E-mail address: [ljzhou@niglas.ac.cn](mailto:ljzhou@niglas.ac.cn)*

- 23 **Total number of pages: 60**
- 24 Page S3: Reagents and Materials.
- 25 Page S3: Samples extraction.
- 26 Page S5: Instrumental conditions.
- 27 Page S6: Method quality.
- 28 Page S8: List of tables in Supplementary Information.
- 29 Pages S9–S53: Tables S1–S12.
- 30 Pages S54-S56: References.

31 **Reagents and Materials.**

32 Methanol and acetonitrile of HPLC grade were purchased from Merck  
33 (Darmstadt, Germany), formic acid from Tedia Company (Fairfield, OH, USA). Other  
34 chemicals disodium ethylenediamine tetraacetate ( $\text{Na}_2\text{EDTA}$ ), citric acid and sodium  
35 citrate were of analytical grade and obtained from Yaohua Chemical Reagent Factory  
36 (Tianjin, China). Strong anion exchange (SAX) cartridges (6 mL, 500 mg) were  
37 provided by Varian (Lake Forest, CA, USA) while Oasis HLB cartridges (6 mL, 200  
38 mg or 6 mL, 500 mg) were supplied by Waters (Milford, MA, USA). Glass fiber  
39 filters (GF/F, pore size 0.7  $\mu\text{m}$ ) were purchased from Whatman (Maidstone, England)  
40 and pyrolyzed at 450 °C for 4 h prior to use.

41 About 10 mg of individual standard (corrected by purity and salt form) was  
42 accurately weighed. Fluoroquinolones (including carbadox) were dissolved in 50 mL  
43 of methanol with 25  $\mu\text{L}$  formic acid. Other agents were dissolved in 50 mL of  
44 methanol and stock solutions were stored at -20°C. From these stock solutions,  
45 working solutions were prepared by gradient dilution.

46

47 **Sample extraction.**

48 *Water.* Lake water samples were filtered through glass fiber filters (0.7  $\mu\text{m}$ ) to remove  
49 particles and the internal standards (100 ng) were added. To improve recovery of  
50 tetracycline antibiotics, 0.2 g  $\text{Na}_2\text{EDTA}$  was added into each water sample. The SPE  
51 cartridges were preconditioned with 10 mL methanol and 10 mL MilliQ water and  
52 then water samples were introduced to the cartridges at a flow rate of 5-10 mL / min.

53 After loading of the water samples, the cartridges were rinsed with 10 mL of MilliQ  
54 water and allowed to dry for 2 hours to remove excess water under vacuum. The  
55 antibiotics retained on the cartridges were eluted with 12 mL methanol and then the  
56 eluates were evaporated to near dryness under a gentle stream of nitrogen and re-  
57 dissolved in 1 mL of methanol. After filtration through a 0.22  $\mu$ m membrane to  
58 remove particles, the final extract was transferred to a 2 mL amber vial and stored at -  
59 18 °C until RRLC-MS/MS analysis. Just prior to the RRLC-MS/MS analysis, 100  $\mu$ L  
60 aliquot of each sample extract was evaporated and reconstituted in a mixed solvent.  
61 *Sediment.* Two grams of each freeze-dried sediment sample were weighted into a 30  
62 mL glass tube, followed by addition of 100  $\mu$ L of the work solutions of the internal  
63 standards (1.0 mg/L each). Then the samples were mixed and placed in a refrigerator  
64 at 4 °C overnight. Ten mL acetonitrile and 10 mL citric acid buffer (pH 3) were added  
65 into each glass tube followed by mixing on a vortex mixer for 1min. All glass tubes  
66 were then ultrasonicated for 15 min and centrifuged at 3024 g for 10 min. The  
67 supernatant from each tube was piped into a 200 mL round-bottom flask. The  
68 extraction process was repeated twice and the supernatants from the three extractions  
69 were combined. The extract in the round-bottom flask from each solid sample was  
70 evaporated at 50 °C to remove the organic solvent, and diluted to 200 mL with Milli-  
71 Q water to make sure that the organic solvent in the solution was less than 5%. Solid  
72 extracts were very dirty with particulate matter and organic matter, which may cause  
73 the cartridges to block or result in serious matrix effect. Strong anion exchange (SAX)  
74 cartridges (6mL, 500mg) and HLB cartridges (6mL, 200mg) were set up in tandem

75 for cleaning up and enriching the aqueous sediment extracts. The SAX cartridge was  
76 placed on top of the HLB cartridge for removing negatively charged humic and fulvic  
77 acids of natural organic matter (NOM) in the solid sample. Prior to the SPE cleanup,  
78 0.2 g of Na<sub>2</sub>EDTA was added into each aqueous extract in order to chelate with metal  
79 cations. Each tandem cartridge was pre-conditioned with 10 mL methanol and 10 mL  
80 Milli-Q water and the diluted extract was passed through the cartridge at a flow rate  
81 of 5 mL/min. Then the SAX cartridge was removed and the HLB cartridge was rinsed  
82 with 10 mL Milli-Q water to remove weakly bound impurities and Na<sub>2</sub>EDTA. The  
83 elution and reconstitution conditions were the same as those described in the water  
84 samples section.

85

#### 86 **LC-MS/MS conditions.**

87 The target antibiotic compounds in the extracts were analyzed by rapid resolution  
88 liquid chromatography–tandem mass spectrometry (RRLC–MS/MS) (Water Acquity  
89 UPLC coupled to AB SCIEX Qtrap 5500) in multiple-reaction monitoring (MRM)  
90 mode. The analyses were performed in the negative mode for two target antibiotic  
91 compounds (CAP and FF) and in the positive mode for the other antibiotic  
92 compounds. Nitrogen gas was used as the drying and collision gas. Mass  
93 spectrometric conditions were optimized using Optimizer (Agilent, Palo Alto, USA)  
94 for collision energy (CE), fragmentor voltage, and multiple reaction monitoring mode  
95 (MRM) transitions for each compound (Table S6). All the target compounds were  
96 separated by BEH-C18 (50 mm × 2.1 mm, 1.7 μm) column with BEH C18 VanGuard

97 pre-column (5 mm × 2.1 mm, 1.7 μm). The column temperature was set at 40 °C. The  
98 injection volume for each sample was 5 μL.

99 The mobile phases for the positive mode were Milli-Q water with 0.2% formic  
100 acid and 2 mM ammonium acetate (A) and acetonitrile (B) at a flow rate of 0.35  
101 mL/min. The mobile phase gradient for the positive mode was ramped from 5% to 10%  
102 B in 5 min, 10-20% B in 1 min, 20-40% B in 3 min, 40-50% B in 2 min and then  
103 ramped to 95% B in 1min and kept for 12 min. The MS operating conditions in the  
104 positive mode were set as follows: curtain gas (CUR), 30; collision gas (CAD),  
105 medium; ionSpray voltage (IS), 5500; temperature, 550 °C; ion source gas 1, 50; ion  
106 source gas 2, 50.

107 The mobile phases for the negative mode were MilliQ water (A) and acetonitrile  
108 (B) at a flow rate of 0.4 mL/min. The mobile phase gradient for the negative mode  
109 was ramped from 20% to 40% B in 3.2 min, and then ramped to 90% B in 0.5 min  
110 and kept for 2 min. The MS operating conditions in the negative mode were set as  
111 follows: curtain gas (CUR), 30; collision gas (CAD), medium; ionSpray voltage (IS),  
112 -4500; temperature, 600 °C; ion source gas 1, 60; ion source gas 2, 50.

113

#### 114 **Method quality.**

115 Concentrations of the target compounds in the samples were performed using internal  
116 standard method. All data generated from the analysis were subject to strict quality  
117 control procedures. With each set of samples to be analyzed, a solvent blank, a  
118 procedure blank and an independent check standard (100 μg/L standard solution) were

119 run in sequence to check for carryover, background contamination, and system  
120 performance. Appropriate field quality assurance and quality control (QA/QC)  
121 procedures were followed. The reported quantitative values of each target compound  
122 in the samples were required to have the same retention time as its calibration  
123 standard (within  $\pm 5\%$ ) and the same ion ratios (within  $\pm 20\%$ ). Independent check  
124 standard was injected approximately every twenty injections, and the concentration  
125 computed was required to be within 20% of the expected value.

126       Method detection limits (MDL) and quantification limits (MQL) were  
127 determined as the minimum detectable amount of an analyte from the two  
128 environmental matrix spiked extract in MRM mode with a signal-to-noise of 3 and 10,  
129 respectively. <sup>1</sup> The S/N ratios were obtained from the data of the recovery test with  
130 the lowest spiked concentration for each compound. Recovery experiments were  
131 performed by spiking the standard solutions to surface water and sediment samples.

132

133

134 **List of tables in Supplementary Information:**

135 **Table S1** Basic information of Lake Taihu

136 **Table S2** Basic information for each sampling site in the Taihu Lake

137 **Table S3** Chemical parameters of water (mg/L) collected from Lake Taihu

138 **Table S4** The particle sizes and TOC of sediment samples of the Lake Taihu

139 **Table S5** Physicochemical properties of the antibiotics in this study.

140 **Table S6** Details of antibiotics and their MRM parameters in RRLC-MS/MS

141 **Table S7** Recoveries ( $n = 3$ ), method detection limits (MDLs), and method

142 quantitation limits (MQLs) of the antibiotics from surface water and sediment.

143 **Table S8** Mass balance of antibiotics in the surface water and sediment of Lake Taihu

144 during two seasons

145 **Table S9** Pseudo-distribution coefficient of antibiotics in Lake Taihu during two

146 seasons

147 **Table S10** Occurrence of antibiotics in aquatic environment in the world

148 **Table S11** Statistical analyses on temporal variations of antibiotics in water and

149 sediment of Lake Taihu

150 **Table S12** Multiple linear regression analyses for the sediment properties (TOC and

151 texture) and concentrations of antibiotics in the sediments of Lake Taihu

152

153



**Table 1** Basin information of Lake Taihu.<sup>a</sup>

| Area               | Main inflow/outflow rivers <sup>b</sup> | Annual runoff (10 <sup>8</sup> m <sup>3</sup> ) <sup>b</sup> | Catchment size (km <sup>2</sup> ) <sup>c</sup> | Population density (Person/km <sup>2</sup> ) <sup>c</sup> | Aquatic products (kg) <sup>c,d</sup> | Livestock                                        |                                                       | Land use for agriculture <sup>c</sup> |                                            |
|--------------------|-----------------------------------------|--------------------------------------------------------------|------------------------------------------------|-----------------------------------------------------------|--------------------------------------|--------------------------------------------------|-------------------------------------------------------|---------------------------------------|--------------------------------------------|
|                    |                                         |                                                              |                                                |                                                           |                                      | Density (Number/km <sup>2</sup> ) <sup>c,e</sup> | Proportion (Pig/cattle/sheep /chicken) <sup>c,e</sup> | agricultural area (km <sup>2</sup> )  | Area of aquatic farming (km <sup>2</sup> ) |
| Northern area      |                                         |                                                              | 6.36×10 <sup>3</sup>                           | 1.06×10 <sup>3</sup>                                      | 1.75×10 <sup>8</sup>                 | 5.47×10 <sup>2</sup>                             | 1/0.07/0.02/0.55                                      | 2.55×10 <sup>2</sup>                  | 2.88×10 <sup>3</sup>                       |
| Meiliang Bay       |                                         |                                                              |                                                |                                                           |                                      |                                                  |                                                       |                                       |                                            |
| Gong Bay           | Wangyu River                            | 8.30/-9.49                                                   |                                                |                                                           |                                      |                                                  |                                                       |                                       |                                            |
| Zhushan Bay        | Yincungang River                        | 5.56/-0.09                                                   |                                                |                                                           |                                      |                                                  |                                                       |                                       |                                            |
| Western area       | Chendonggang River                      | 9.98/-0.23                                                   | 4.51×10 <sup>3</sup>                           | 5.32×10 <sup>2</sup>                                      | 1.92×10 <sup>8</sup>                 | 5.24×10 <sup>2</sup>                             | 1/0.01/0.05/0.84                                      | 4.36×10 <sup>2</sup>                  | 2.44×10 <sup>3</sup>                       |
| South area         | Xitiaoxi River                          | 7.05/-1.38                                                   | 1.02×10 <sup>4</sup>                           | 3.01×10 <sup>2</sup>                                      | 3.58×10 <sup>8</sup>                 | 5.84×10 <sup>2</sup>                             | 1/0.02/0.08/0.55                                      | 3.22×10 <sup>2</sup>                  | 1.78×10 <sup>3</sup>                       |
|                    | Dongtiaoxi River                        | 7.29/-9.68                                                   |                                                |                                                           |                                      |                                                  |                                                       |                                       |                                            |
| Eastern coast area | Xijiang River                           | 0.05/-5.79                                                   | 3.92×10 <sup>3</sup>                           | 8.84×10 <sup>2</sup>                                      | 1.80×10 <sup>8</sup>                 | 4.23×10 <sup>3</sup>                             | 1/0.00/0.03/0.10                                      | 1.18×10 <sup>2</sup>                  | 3.40×10 <sup>3</sup>                       |
| East Lake          | Taipu River                             | 0.19/-36.85                                                  | 4.23×10 <sup>3</sup>                           | 1.85×10 <sup>3</sup>                                      | 2.22×10 <sup>8</sup>                 | 4.91×10 <sup>2</sup>                             | 1/0.08/0.03/0.53                                      | 6.15×10 <sup>2</sup>                  | 1.29×10 <sup>3</sup>                       |
|                    | Xinyun River                            | 0.43/-9.05                                                   |                                                |                                                           |                                      |                                                  |                                                       |                                       |                                            |
| The pelagic zone   |                                         |                                                              |                                                |                                                           |                                      |                                                  |                                                       |                                       |                                            |

<sup>a</sup> Revised based on our previous paper. <sup>2</sup> <sup>b</sup> Inflow is defined as positive and outflow is defined negative, and the data are cited from Qin et al. (2007).<sup>3</sup> <sup>c</sup> Calculated based on data from Wuxi Statistical Yearbook 2014, Suzhou Statistical Yearbook 2014, Hangzhou Statistical Yearbook 2014, Changzhou Statistical Yearbook 2014, Jiaxing Statistical Yearbook 2014, Huzhou Statistical Yearbook 2014. <sup>4-9</sup> <sup>d</sup> Aquatic products refer to seafood products such as fish and shrimp. <sup>e</sup> Livestock includes cattle, pigs, sheep, and poultry; and the number of animals other than the pig was converted into the number of pigs according to the volume of waste generated by each animal.

**Table S2** Basic information for each sampling site in the Taihu Lake

| Site | Geographic location<br>(N, E) |           | Weighted water area <sup>a</sup> | Depth (m) |      | Conductivity<br>( $\mu\text{s}/\text{cm}$ ) |      | Water pH |      | Turbidity (NTU) |      | Chl-a<br>( $\mu\text{g}/\text{L}$ ) |      | Phycocyanobilin<br>(cell/mL) |      | Do<br>(mg/L) |      |
|------|-------------------------------|-----------|----------------------------------|-----------|------|---------------------------------------------|------|----------|------|-----------------|------|-------------------------------------|------|------------------------------|------|--------------|------|
|      |                               |           |                                  | May       | Nov. | May                                         | Nov. | May      | Nov. | May             | Nov. | May                                 | Nov. | May                          | Nov. | May          | Nov. |
| S1   | 120°13'10"                    | 31°32'23" | 1/8Average area                  | 3.6       | 2.7  | 618                                         | 462  | 8.6      | 8.63 | 8.2             | 23.9 | 6.2                                 | 8.3  | 282                          | 7810 | 9.66         | 12.0 |
| S2   | 120°11'26"                    | 31°30'47" | 1/4Average area                  | 2         | 2.2  | 571                                         | 470  | 8.41     | 8.33 | 4.7             | 13.6 | 1.4                                 | 11.6 | 274                          | 5080 | 9.01         | 11.2 |
| S3   | 120°11'40"                    | 31°28'35" | 1/4Average area                  | 2.4       | 2.7  | 548                                         | 462  | 8.54     | 8.63 | 14.9            | 23.9 | 20.4                                | 8.3  | 1840                         | 7810 | 12.0         | 12.0 |
| S4   | 120°11'17"                    | 31°26'10" | 1/4Average area                  | 2.5       | 2.8  | 552                                         | 463  | 8.48     | 8.52 | 14.2            | 15.3 | 5.1                                 | 4.5  | 300                          | 3152 | 9.02         | 11.7 |
| S5   | 120°11'14"                    | 31°24'40" | 1/4Average area                  | 2.7       | 2.7  | 542                                         | 460  | 8.95     | 8.43 | 10.5            | 21   | 3.9                                 | 6.4  | 127                          | 6360 | 9.15         | 11.0 |
| S6   | 120°7'52"                     | 31°30'14" | Average area                     | 1.6       | 1.7  | 645                                         | 468  | 8.14     | 8.32 | 18.8            | 14.3 | 36.4                                | 4.9  | 4200                         | 3160 | 12.4         | 11.8 |
| S7   | 120°10'49"                    | 31°20'18" | 1.2Average area                  | 2.9       | 1.8  | 696                                         | 439  | 6.98     | 8.48 | 50              | 18.2 | 7                                   | 3.9  | 6170                         | 3140 | 8.96         | 11.2 |
| S8   | 120°10'14"                    | 31°14'53" | 2Average area                    | 2.8       | 3    | 597                                         | 440  | 8.23     | 8.15 | 35.7            | 26.3 | 5                                   | 2.4  | 2510                         | 3650 | 8.55         | 11.1 |
| S9   | 120°15'11"                    | 31°30'47" | 1/8Average area                  | 2.3       | 2.7  | 31                                          | 385  | 8.32     | 8.36 | 8.8             | 24.6 | 15.5                                | 15.1 | 3030                         | 1350 | 11.2         | 9.48 |
| S10  | 119°56'42"                    | 31°18'52" | 2Average area                    | 1.8       | 1.9  | 616                                         | 572  | 8.82     | 8.27 | 59              | 43.3 | 16.4                                | 9.4  | NA <sup>b</sup>              | 1460 | 6.02         | 5.69 |
| S11  | 120°7'7"                      | 30°57'49" | 1.5Average area                  | 1.7       | 2.2  | 546                                         | 315  | 8.77     | 8.22 | 33.4            | 58.6 | 8.8                                 | 4    | NA                           | 1470 | 9.53         | 11.0 |
| S12  | 120°27'14"                    | 31°1'18"  | 1Average area                    | 1.1       | 1.6  | 486                                         | 445  | 8.72     | 8.07 | 11.8            | 4.7  | 4.8                                 | 3.3  | NA                           | 457  | 9.31         | 10.7 |
| S13  | 120°17'44"                    | 31°23'11" | 1.2Average area                  | 1.8       | 2.2  | 649                                         | 407  | 8.58     | 8.44 | 51.8            | 30   | 8.6                                 | 8.7  | NA                           | 4040 | 8.8          | 10.9 |
| S14  | 120°22'37"                    | 31°26'6"  | 1.2Average area                  | 1.8       | 2.5  | 489                                         | 427  | 8.67     | 8.37 | 39.2            | 18.4 | 6.2                                 | 13   | NA                           | 2290 | 8.66         | 11.1 |
| S15  | 120°14'10"                    | 31°31'23" | 1/10Average area                 | 2.3       | 2.3  | 476                                         | 387  | 8.1      | 8.34 | 11              | 18.8 | 17.8                                | 22.7 | 3500                         | 1640 | 10.6         | 10.0 |
| S16  | 120°1'41"                     | 31°27'    | Average area                     | 1.8       | 2.2  | 669                                         | 552  | 8.52     | 7.99 | 11.6            | 3.5  | 16.3                                | 2.7  | NA                           | 200  | 6.75         | 8.63 |
| S17  | 120°1'55"                     | 31°23'51" | Average area                     | 2.1       | 2.4  | 658                                         | 476  | 8.5      | 8.16 | 17.8            | 2.6  | 5.3                                 | 7.5  | NA                           | 943  | 7.99         | 10.2 |
| S18  | 120°3'22"                     | 31°18'29" | 1.6Average area                  | 2.9       | 2.6  | 629                                         | 463  | 7.26     | 8.48 | 47.6            | 29.7 | 6                                   | 2.6  | 1930                         | 2310 | 8.53         | 11.1 |
| S19  | 120°1'24"                     | 31°11'26" | 1.6Average area                  | 2.8       | 3.24 | 534                                         | 457  | 7.41     | 8.6  | 72.3            | 44.8 | 8.3                                 | 3.4  | 3012                         | 9090 | 8.38         | 10.8 |
| S20  | 119°58'2"                     | 31°6'28"  | 1.7Average area                  | 2.1       | 2.4  | 553                                         | 458  | 8.76     | 8.24 | 67.6            | 41.5 | 6.4                                 | 4.4  | NA                           | 5490 | 8.83         | 10.8 |

|     |            |           |                 |     |     |     |     |      |      |      |      |     |      |      |      |      |      |
|-----|------------|-----------|-----------------|-----|-----|-----|-----|------|------|------|------|-----|------|------|------|------|------|
| S21 | 120°8'38"  | 31°6'59"  | 2Average area   | 2.7 | 2.7 | 378 | 441 | 7.65 | 8.19 | 59.7 | 46.6 | 8.2 | 4.2  | 3260 | 9090 | 8.67 | 10.8 |
| S22 | 120°11'23" | 30°59'28" | Average area    | 1.9 | 2.6 | 546 | 422 | 8.75 | 8.17 | 90.7 | 38.6 | 6.4 | 3.1  | NA   | 3700 | 8.87 | 11.0 |
| S23 | 120°13'58" | 31°0'45"  | Average area    | 2.1 | 2.7 | 573 | 428 | 8.7  | 8.19 | 95.2 | 26.6 | 7.4 | 2.8  | NA   | 3630 | 8.92 | 11.1 |
| S24 | 120°22'45" | 30°58'51" | 1.2Average area | 1.5 | 2.1 | 573 | 338 | 8.68 | 8.23 | 13.5 | 7.1  | 5.2 | 4    | NA   | 256  | 9.5  | 9.56 |
| S25 | 120°30'48" | 31°5'22"  | Average area    | 1.1 | 1.7 | 416 | 463 | 8.89 | 8.06 | 2.3  | 6.7  | 5.6 | 13.2 | NA   | 3410 | 11.2 | 8.91 |
| S26 | 120°20'8"  | 31°5'57"  | Average area    | 1.6 | 2   | 5   | 477 | 8.75 | 8.01 | 15.8 | 10.9 | 6.7 | 2.3  | NA   | 576  | 8.48 | 9.97 |
| S27 | 120°24'21" | 31°10'37" | Average area    | 1.4 | 2   | 554 | 450 | 8.17 | 8.16 | 50.6 | 2    | 8.4 | 1.1  | 3860 | NA   | 8.94 | 11.6 |
| S28 | 120°27'53" | 31°12'20" | Average area    | 1.6 | 1.9 | 483 | 443 | 8.62 | 8.26 | 5.5  | 4.56 | 3   | 6.4  | 465  | 894  | 12.2 | 10.4 |
| S29 | 120°20'1"  | 31°10'16" | 1.2Average area | 2.4 | 2.2 | 574 | 341 | 7.95 | 8.21 | 36.4 | 23.6 | 8   | 2.9  | 3670 | 3340 | 8.9  | 10.7 |
| S30 | 120°19'53" | 31°14'41" | Average area    | 1.9 | 2.4 | 549 | 432 | 8.67 | 8.16 | 32.9 | 18.5 | 6.9 | 4.2  | NA   | 2580 | 8.83 | 11.0 |
| S31 | 120°14'30" | 31°21'12" | Average area    | 1.6 | 2.6 | 603 | 438 | 8.61 | 8.54 | 37   | 33.4 | 5.1 | 4.6  | NA   | 3520 | 8.56 | 11.0 |
| S32 | 120°8'45"  | 31°24'24" | 1/2Average area | 2.4 | 2.2 | 665 | 464 | 9.38 | 8.49 | 64.8 | 19   | 7.3 | 7.7  | NA   | 3100 | 9.13 | 10.5 |

<sup>a</sup> The weighted water areas used for mass balance calculation equal to weighting coefficient  $\times$  Average water area, based on real occupied areas. The average area value 73,062,500 m<sup>2</sup> at each sampling site was obtained by the whole areas of Lake Taihu (2,338 km<sup>2</sup>) divided by 32 sites. <sup>b</sup> NA: Not available.

**Table S3** Chemical parameters of water (mg/L) collected from Lake Taihu

| Location | Summer           |      |       |      |                    | Winter           |      |       |      |                    |
|----------|------------------|------|-------|------|--------------------|------------------|------|-------|------|--------------------|
|          | BOD <sub>5</sub> | COD  | TP    | TN   | NH <sub>4</sub> -N | BOD <sub>5</sub> | COD  | TP    | TN   | NH <sub>4</sub> -N |
| S1       | 1.82             | 4.11 | 0.081 | 1.90 | 0.46               | 4.02             | 4.22 | 0.097 | 1.76 | 0.53               |
| S2       | 1.86             | 4.27 | 0.065 | 2.67 | 0.42               | 1.92             | 4.00 | 0.082 | 1.44 | 0.49               |
| S3       | 2.42             | 5.53 | 0.142 | 4.46 | 0.61               | 2.14             | 6.29 | 0.147 | 2.24 | 0.42               |
| S4       | 1.65             | 4.89 | 0.104 | 4.29 | 0.46               | 1.27             | 4.33 | 0.090 | 1.63 | 0.39               |
| S5       | 1.36             | 3.86 | 0.079 | 3.45 | 0.50               | 1.59             | 4.30 | 0.101 | 1.50 | 0.42               |
| S6       | 1.80             | 4.77 | 0.140 | 4.75 | 0.88               | 1.68             | 4.55 | 0.102 | 1.82 | 0.40               |
| S7       | 2.09             | 4.50 | 0.090 | 3.97 | 0.48               | 1.78             | 4.98 | 0.109 | 1.44 | 0.43               |
| S8       | 1.24             | 3.41 | 0.064 | 2.72 | 0.60               | 0.81             | 3.93 | 0.073 | 1.05 | 0.50               |
| S9       | 3.16             | 3.63 | 0.057 | 1.14 | 0.60               | 2.78             | 4.04 | 0.092 | 1.10 | 0.34               |
| S10      | 6.51             | 5.92 | 0.265 | 4.92 | 1.11               | 3.25             | 5.95 | 0.258 | 4.51 | 1.86               |
| S11      | 1.47             | 3.35 | 0.057 | 2.52 | 0.39               | 1.72             | 4.64 | 0.115 | 3.24 | 0.36               |
| S12      | 1.24             | 3.64 | 0.043 | 1.15 | 0.38               | 0.75             | 3.34 | 0.027 | 0.77 | 0.40               |
| S13      | 1.16             | 3.19 | 0.077 | 3.27 | 0.32               | 1.39             | 3.48 | 0.073 | 1.03 | 0.42               |
| S14      | 1.43             | 2.86 | 0.075 | 1.96 | 0.57               | 1.35             | 3.88 | 0.074 | 0.91 | 0.39               |
| S15      | 4.24             | 3.84 | 0.068 | 1.23 | 0.39               | 3.98             | 4.20 | 0.092 | 0.99 | 0.27               |
| S16      | 4.26             | 5.71 | 0.161 | 5.04 | 1.69               | 1.55             | 4.91 | 0.133 | 3.42 | 1.35               |
| S17      | 1.82             | 5.55 | 0.158 | 5.39 | 1.02               | 2.06             | 4.49 | 0.093 | 3.21 | 0.74               |
| S18      | 1.51             | 3.30 | 0.077 | 3.18 | 0.30               | 1.43             | 4.27 | 0.098 | 1.35 | 0.41               |
| S19      | 1.28             | 3.97 | 0.133 | 3.62 | 0.48               | 1.80             | 4.74 | 0.120 | 1.54 | 0.29               |
| S20      | 1.45             | 3.30 | 0.086 | 2.85 | 0.37               | 1.78             | 4.48 | 0.117 | 1.75 | 0.36               |
| S21      | 1.20             | 3.19 | 0.063 | 2.74 | 0.19               | 1.17             | 3.75 | 0.089 | 1.37 | 0.33               |
| S22      | 1.03             | 3.69 | 0.075 | 2.89 | 0.28               | 1.49             | 4.33 | 0.087 | 1.57 | 0.46               |

---

|     |      |      |       |      |      |      |      |       |      |      |
|-----|------|------|-------|------|------|------|------|-------|------|------|
| S23 | 1.30 | 3.52 | 0.076 | 2.73 | 0.19 | 1.31 | 3.51 | 0.059 | 1.26 | 0.40 |
| S24 | 2.42 | 4.12 | 0.031 | 1.98 | 0.16 | 0.83 | 2.88 | 0.028 | 2.41 | 0.45 |
| S25 | 2.05 | 4.81 | 0.036 | 0.76 | 0.30 | 2.26 | 4.63 | 0.057 | 1.02 | 0.43 |
| S26 | 4.69 | 5.70 | 0.038 | 1.75 | 0.26 | 0.73 | 2.89 | 0.026 | 0.70 | 0.33 |
| S27 | 1.16 | 3.17 | 0.049 | 1.90 | 0.29 | 0.69 | 2.81 | 0.021 | 0.55 | 0.21 |
| S28 | 0.72 | 3.03 | 0.021 | 1.04 | 0.18 | 0.73 | 2.99 | 0.017 | 0.48 | 0.24 |
| S29 | 1.20 | 3.11 | 0.050 | 2.30 | 0.25 | 1.39 | 4.03 | 0.047 | 1.41 | 0.22 |
| S30 | 1.61 | 3.19 | 0.046 | 2.07 | 0.22 | 1.17 | 3.41 | 0.038 | 0.84 | 0.30 |
| S31 | 1.07 | 3.25 | 0.065 | 2.68 | 0.52 | 1.63 | 4.63 | 0.112 | 1.46 | 0.47 |
| S32 | 2.19 | 4.73 | 0.112 | 4.08 | 0.32 | 2.30 | 3.91 | 0.089 | 1.45 | 0.42 |

---

**Table S4** The particle sizes and TOC of sediment samples of the Lake Taihu

| Sites | >0.064 mm |          | 0.016-0.064 mm |          | 0.004-0.016 mm |          | <0.004 mm |          | TOC    |          |
|-------|-----------|----------|----------------|----------|----------------|----------|-----------|----------|--------|----------|
|       | (sand)    |          | (coarse silt)  |          | (fine silt)    |          | (clay)    |          | (% )   |          |
|       | May       | November | May            | November | May            | November | May       | November | May    | November |
| S1    | ND        | 2.95     | 41.09          | 45.57    | 48.39          | 41.51    | 10.52     | 9.98     | 1.2671 | 1.3706   |
| S2    | 1.73      | 7.81     | 40.58          | 43.10    | 50.41          | 42.08    | 7.28      | 7.02     | 0.8542 | 0.7542   |
| S3    | 1.36      | 2.96     | 37.21          | 38.73    | 50.88          | 47.95    | 10.55     | 10.36    | 0.8071 | 0.8472   |
| S4    | ND        | 0.13     | 33.52          | 31.38    | 55.75          | 59.99    | 10.73     | 8.51     | 0.7878 | 0.7963   |
| S5    | 0.74      | 0.85     | 38.54          | 34.83    | 51.60          | 54.16    | 9.12      | 10.17    | 0.7422 | 0.7968   |
| S6    | 2.21      | 3.87     | 55.22          | 64.18    | 33.77          | 24.97    | 8.81      | 6.98     | 0.6063 | 0.4570   |
| S7    | 3.15      | 2.89     | 37.94          | 36.29    | 52.08          | 53.31    | 6.84      | 7.51     | 0.6552 | 0.5970   |
| S8    | 6.98      | 1.03     | 49.58          | 37.43    | 31.33          | 49.33    | 12.11     | 12.21    | 0.4357 | 0.5078   |
| S9    | 4.90      | 0        | 43.55          | 29.63    | 39.37          | 57.38    | 12.19     | 12.99    | 1.2062 | 1.1516   |
| S10   | 0.12      | 0.51     | 61.30          | 63.47    | 34.66          | 32.44    | 3.92      | 3.58     | 0.5892 | 0.6297   |
| S11   | 2.59      | 0        | 40.46          | 37.23    | 44.38          | 54.75    | 12.58     | 8.02     | 0.5469 | 0.4683   |
| S12   | 0.31      | 0        | 46.76          | 45.57    | 43.37          | 43.62    | 9.56      | 10.81    | 1.2447 | 1.0917   |
| S13   | 0.13      | 0        | 33.64          | 33.18    | 54.84          | 57.59    | 11.39     | 9.23     | 0.8067 | 0.7778   |
| S14   | 0.45      | 0        | 42.39          | 36.33    | 45.25          | 47.64    | 11.91     | 16.03    | 0.7229 | 0.3594   |
| S15   | 4.68      | 2.72     | 44.49          | 58.19    | 37.75          | 32.53    | 13.09     | 6.57     | 1.1264 | 0.7790   |
| S16   | 3.35      | 0        | 46.02          | 37.64    | 40.90          | 51.81    | 9.73      | 10.55    | 1.2403 | 1.1231   |
| S17   | 0.56      | 1.97     | 42.83          | 43.68    | 45.42          | 43.96    | 11.19     | 10.39    | 1.0943 | 1.0288   |
| S18   | 0.95      | 0.01     | 33.68          | 33.36    | 55.86          | 58.84    | 9.52      | 7.79     | 0.7321 | 0.6629   |
| S19   | 2.28      | 4.51     | 42.78          | 48.76    | 46.97          | 38.71    | 7.97      | 8.03     | 0.5563 | 0.4610   |
| S20   | 6.05      | 0.86     | 41.15          | 41.45    | 44.54          | 51.80    | 8.26      | 5.90     | 0.5683 | 0.5318   |
| S21   | 0.87      | 0        | 36.64          | 35.25    | 53.34          | 55.67    | 9.16      | 9.09     | 0.5838 | 0.6537   |
| S22   | ND        | 0.13     | 32.97          | 34.75    | 56.22          | 53.16    | 10.81     | 11.96    | 0.6406 | 0.5992   |

|     |                 |      |       |       |       |       |       |       |        |        |
|-----|-----------------|------|-------|-------|-------|-------|-------|-------|--------|--------|
| S23 | 0.27            | 0    | 37.12 | 33.28 | 52.11 | 55.19 | 10.50 | 11.53 | 0.6068 | 0.6331 |
| S24 | 4.50            | 1    | 43.26 | 47.25 | 41.92 | 44.05 | 10.32 | 7.69  | 1.0852 | 1.0552 |
| S25 | 3.17            | 3.69 | 66.38 | 61.11 | 26.36 | 29.87 | 4.10  | 5.32  | 1.3125 | 1.0843 |
| S26 | 0.99            | 3.67 | 40.85 | 33.71 | 49.29 | 49.84 | 8.88  | 12.78 | 1.0568 | 1.3062 |
| S27 | 6.66            | 0.09 | 41.06 | 47.21 | 41.23 | 42.73 | 11.06 | 9.96  | 0.5879 | 0.9489 |
| S28 | NA <sup>a</sup> | NA   | NA    | NA    | NA    | NA    | NA    | NA    | NA     | NA     |
| S29 | 2.01            | NA   | 40.15 | NA    | 47.11 | NA    | 10.73 | NA    | 0.6701 | NA     |
| S30 | 8.65            | 6.91 | 52.97 | 55.27 | 31.73 | 30.49 | 6.65  | 7.33  | 0.6383 | 0.6042 |
| S31 | 4.75            | 1.48 | 43.89 | 45.05 | 43.34 | 46.89 | 8.03  | 6.58  | 0.6526 | 0.5965 |
| S32 | 1.41            | 0    | 29.90 | 32.05 | 59.22 | 61.97 | 9.48  | 5.98  | 0.7845 | 0.7233 |

<sup>a</sup> NA: Not available

**Table S5** Physicochemical properties of the antibiotics in this study.

| Class                     | Compound             | CAS       | MW    | Formula                                                                    | Solubility<br>(in water, mg L <sup>-1</sup> ) | LogK <sub>ow</sub> <sup>a</sup>       | pK <sub>a</sub> <sup>b</sup>                | Solid–water distribution        |                        |            |
|---------------------------|----------------------|-----------|-------|----------------------------------------------------------------------------|-----------------------------------------------|---------------------------------------|---------------------------------------------|---------------------------------|------------------------|------------|
|                           |                      |           |       |                                                                            |                                               |                                       |                                             | Matrices                        | Kd (L/kg)              | Koc (L/kg) |
| <b>Sulfonamides</b>       | Sulfacetamide        | 144-80-9  | 214.2 | C <sub>8</sub> H <sub>10</sub> N <sub>2</sub> O <sub>3</sub> S             | 12500 <sup>c</sup>                            | -0.96 <sup>c</sup>                    | 5.4 <sup>d</sup>                            |                                 |                        |            |
|                           | Sulfachlorpyridazine | 80-32-0   | 284.7 | C <sub>10</sub> H <sub>9</sub> ClN <sub>4</sub> O <sub>2</sub> S           |                                               |                                       | 1.87, 5.45 <sup>e</sup>                     | Clay loamy, sandy loam          | 0.9-1.8 <sup>f</sup>   |            |
|                           | Sulfadiazine         | 68-35-9   | 250.3 | C <sub>10</sub> H <sub>10</sub> N <sub>4</sub> O <sub>2</sub> S            | 77 <sup>f</sup>                               | -0.09 <sup>f</sup>                    | 1.6 6.4 <sup>f</sup>                        | Whole soil, clay, sand fraction | 1.4-2.8 <sup>f</sup>   | 37-125     |
|                           | Sulfadoxine          | 2447-57-6 | 310.3 | C <sub>12</sub> H <sub>14</sub> N <sub>4</sub> O <sub>4</sub> S            | 2700 <sup>c</sup>                             | 0.7 <sup>c</sup>                      | 3.15 6.16 <sup>g</sup>                      |                                 |                        |            |
|                           | Sulfadimethoxine     | 122-11-2  | 310.3 | C <sub>12</sub> H <sub>14</sub> N <sub>4</sub> O <sub>4</sub> S            | 343 <sup>c</sup>                              | 1.63 <sup>c</sup><br>1.4 <sup>h</sup> | 6.3 <sup>d</sup><br>2.13, 6.08 <sup>e</sup> | Whole soil, clay, sand fraction | 2.3-4.6 <sup>f</sup>   | 89-144     |
|                           | Sulfamethazine       | 57-68-1   | 278.3 | C <sub>12</sub> H <sub>14</sub> N <sub>4</sub> O <sub>2</sub> S            | 1500 <sup>f</sup>                             | 0.80 <sup>f</sup>                     | 2.07 7.49 <sup>e</sup><br>2.65 <sup>d</sup> | Sand, loamy sand, sandy loam    | 0.6-3.2 <sup>f</sup>   | 82-208     |
|                           | Sulfamethoxazole     | 723-46-6  | 253.3 | C <sub>10</sub> H <sub>11</sub> N <sub>3</sub> O <sub>3</sub> S            | 610 <sup>c</sup>                              | 0.89 <sup>c</sup>                     | 1.85 5.6 <sup>c</sup><br>5.9 <sup>d</sup>   |                                 |                        |            |
|                           | Sulfamonomethoxine   | 1220-83-3 | 280.3 | C <sub>11</sub> H <sub>12</sub> N <sub>4</sub> O <sub>3</sub> S            | 4030 <sup>c</sup>                             | 0.7 <sup>c</sup>                      |                                             |                                 |                        |            |
|                           | Sulfapyridine        | 144-83-2  | 249.3 | C <sub>11</sub> H <sub>11</sub> N <sub>3</sub> O <sub>2</sub> S            | 270 <sup>f</sup>                              | 0.35 <sup>f</sup>                     | 2.58 8.43 <sup>f</sup><br>8.4 <sup>d</sup>  | Silty loam                      | 1.6-7.4 <sup>f</sup>   | 101-308    |
|                           |                      |           |       |                                                                            |                                               |                                       |                                             | Whole soil, clay, sand fraction | 3.1-3.5 <sup>f</sup>   | 80-218     |
|                           | Sulfaquinoxaline     | 59-40-5   | 300.4 | C <sub>14</sub> H <sub>12</sub> N <sub>4</sub> O <sub>2</sub> S            | 7.5 <sup>c</sup>                              | 1.68 <sup>c</sup>                     |                                             |                                 |                        |            |
|                           | Sulfisoxazole        | 127-69-5  | 267.3 | C <sub>11</sub> H <sub>13</sub> N <sub>3</sub> O <sub>3</sub> S            | 300 <sup>c</sup>                              | 1.01 <sup>c</sup>                     |                                             | Clay loam                       | 1.5 <sup>i</sup>       | 48         |
|                           | Sulfathiazole        | 72-14-0   | 255.3 | C <sub>9</sub> H <sub>9</sub> N <sub>3</sub> O <sub>2</sub> S <sub>2</sub> | 373 <sup>c</sup>                              | 0.05 <sup>c</sup>                     | 2.0 <sup>d</sup><br>2.01, 7.11 <sup>e</sup> | Loamy sand                      | 4.9 <sup>j</sup>       | 200        |
| <b>Diaminopyrimidines</b> | Trimethoprim         | 738-70-5  | 290.3 | C <sub>14</sub> H <sub>18</sub> N <sub>4</sub> O <sub>3</sub>              | 400 <sup>c</sup>                              | 0.91 <sup>c</sup>                     | 3.23 6.76 <sup>c</sup>                      | Sewage sludge                   | 76 <sup>i</sup>        | 205        |
| <b>Tetracyclines</b>      | Chlortetracycline    | 57-62-5   | 478   | C <sub>22</sub> H <sub>23</sub> ClN <sub>2</sub> O <sub>8</sub>            | 630 <sup>c</sup>                              | -0.62 <sup>c</sup>                    | 3.33 7.55 9.33 <sup>e</sup>                 | Clay loam, sandy loam           | 1280-2386 <sup>f</sup> |            |



|                         |                 |             |        |                                                                              |                     |                    |                                      |                        |                          |              |
|-------------------------|-----------------|-------------|--------|------------------------------------------------------------------------------|---------------------|--------------------|--------------------------------------|------------------------|--------------------------|--------------|
|                         | Doxycycline     | 564-25-0    | 444.4  | C <sub>22</sub> H <sub>24</sub> N <sub>2</sub> O <sub>8</sub>                | 630 <sup>c</sup>    | -0.02 <sup>c</sup> | 3.02 7.97 9.15 <sup>e</sup>          |                        |                          |              |
|                         | Oxytetracycline | 79-57-2     | 460.4  | C <sub>22</sub> H <sub>24</sub> N <sub>2</sub> O <sub>8</sub>                | 1000 <sup>j</sup>   | -1.22 <sup>j</sup> | 3.22 7.46 8.94 <sup>e</sup>          | Loamy sand, sand       | 417-1026 <sup>f</sup>    | 42506-9337   |
|                         | Tetracycline    | 60-54-8     | 444.4  | C <sub>22</sub> H <sub>24</sub> N <sub>2</sub> O <sub>8</sub>                | 1700 <sup>j</sup>   | -1.19 <sup>j</sup> | 3.32 7.78 9.58 <sup>e</sup>          | Clay loam, sandy loam  | 1147-2370 <sup>f</sup>   |              |
|                         |                 |             |        |                                                                              |                     |                    |                                      | Aldrich humic acid     | 1430-2060 <sup>j</sup>   |              |
| <b>Fluoroquinolones</b> | Ciprofloxacin   | 85721-33-1  | 331.3  | C <sub>17</sub> H <sub>18</sub> FN <sub>3</sub> O <sub>3</sub>               | 30000 <sup>j</sup>  | 0.4 <sup>j</sup>   | 3.01 6.14 8.70<br>10.58 <sup>e</sup> | Loamy sand             | 427 <sup>f</sup>         | 61000        |
|                         |                 |             |        |                                                                              |                     |                    |                                      | Sewage sludge          | 417 <sup>f</sup>         | 1127         |
|                         | Danofloxacin    | 112398-08-0 | 357.4  | C <sub>19</sub> H <sub>20</sub> FN <sub>3</sub> O <sub>3</sub>               |                     | 1.85 <sup>f</sup>  | 2.73 9.13 <sup>f</sup>               | Humic acid from a soil | 630 <sup>j</sup>         |              |
|                         | Difloxacin      | 98106-17-3  | 399.4  | C <sub>21</sub> H <sub>19</sub> F <sub>2</sub> N <sub>3</sub> O <sub>3</sub> | 1330 <sup>c</sup>   | 0.89 <sup>c</sup>  |                                      |                        |                          |              |
|                         | Enrofloxacin    | 93106-60-6  | 359.4  | C <sub>19</sub> H <sub>22</sub> FN <sub>3</sub> O <sub>3</sub>               | 130000 <sup>c</sup> | 1.1 <sup>j</sup>   | 3.85 6.19 7.59 9.86 <sup>e</sup>     | Clay, loam, loamy sand | 260-5612 <sup>f</sup>    | 16510-99980  |
|                         |                 |             |        |                                                                              |                     |                    |                                      | Humic acid from a soil | 110 <sup>j</sup>         |              |
|                         | Fleroxacin      | 79660-72-3  | 369.34 | C <sub>17</sub> H <sub>18</sub> F <sub>3</sub> N <sub>3</sub> O <sub>3</sub> | 7320 <sup>c</sup>   | 0.24 <sup>c</sup>  |                                      |                        |                          |              |
|                         | Lomefloxacin    | 98079-51-7  | 351.3  | C <sub>17</sub> H <sub>19</sub> F <sub>2</sub> N <sub>3</sub> O <sub>3</sub> | 27200 <sup>c</sup>  | -0.3 <sup>c</sup>  |                                      |                        |                          |              |
|                         | Marbofloxacin   | 115550-35-1 | 362.4  | C <sub>17</sub> H <sub>19</sub> FN <sub>4</sub> O <sub>4</sub>               |                     |                    |                                      |                        |                          |              |
|                         | Norfloxacin     | 70458-96-7  | 319.3  | C <sub>16</sub> H <sub>18</sub> FN <sub>3</sub> O <sub>3</sub>               | 17800 <sup>c</sup>  | -1.03 <sup>c</sup> | 3.11 6.10 8.6 10.56 <sup>e</sup>     |                        |                          |              |
|                         | Ofloxacin       | 82419-36-1  | 361.3  | C <sub>18</sub> H <sub>20</sub> FN <sub>3</sub> O <sub>4</sub>               | 2830 <sup>c</sup>   | 0.36 <sup>i</sup>  | 5.97 8.28 <sup>k</sup>               | Humic acid from a soil | 100 <sup>j</sup>         |              |
|                         |                 |             |        |                                                                              |                     |                    |                                      | Loamy sand             | 309 <sup>i</sup>         | 44140        |
|                         | Pefloxacin      | 70458-92-3  | 333.4  | C <sub>17</sub> H <sub>20</sub> FN <sub>3</sub> O <sub>3</sub>               | 1140 <sup>c</sup>   | 0.27 <sup>c</sup>  |                                      |                        |                          |              |
|                         | Sarafloxacin    | 98105-99-8  | 385.4  | C <sub>20</sub> H <sub>17</sub> F <sub>2</sub> N <sub>3</sub> O <sub>3</sub> | 100 <sup>j</sup>    | 1.07 <sup>c</sup>  | 6.0 8.6 <sup>j</sup>                 | Aldrich humic acid     | 18700-52700 <sup>j</sup> | 55000-155000 |
|                         | Carbadox        | 6804-7-5    | 262.2  | C <sub>11</sub> H <sub>10</sub> N <sub>4</sub> O <sub>4</sub>                | 15000 <sup>c</sup>  | -1.37 <sup>c</sup> |                                      |                        |                          |              |

|                                    |                               |            |       |                                                                                |                                      |                                           |                                             |                      |                  |          |
|------------------------------------|-------------------------------|------------|-------|--------------------------------------------------------------------------------|--------------------------------------|-------------------------------------------|---------------------------------------------|----------------------|------------------|----------|
| <b>Macrolides</b>                  | Azithromycin                  | 83905-01-5 | 749   | C <sub>38</sub> H <sub>72</sub> N <sub>2</sub> O <sub>12</sub>                 |                                      |                                           |                                             |                      |                  |          |
|                                    | Clarithromycin                | 81103-11-9 | 748.0 | C <sub>38</sub> H <sub>69</sub> NO <sub>13</sub>                               | 0.342 <sup>c</sup>                   | 3.16 <sup>c</sup>                         | 8.99 <sup>c</sup>                           |                      |                  |          |
|                                    | Erythromycin                  | 114-07-8   | 733.9 | C <sub>37</sub> H <sub>67</sub> NO <sub>13</sub>                               | 2000 <sup>l</sup>                    | 3.06 <sup>c</sup>                         | 8.9 <sup>e</sup>                            |                      |                  |          |
|                                    | Erythromycin-H <sub>2</sub> O | 23893-13-2 | 715.9 | C <sub>37</sub> H <sub>65</sub> NO <sub>12</sub>                               |                                      |                                           |                                             |                      |                  |          |
|                                    | Leucomycin                    | 1392-21-8  | 771   | C <sub>39</sub> H <sub>65</sub> NO <sub>14</sub>                               |                                      |                                           |                                             |                      |                  |          |
|                                    | Oleandomycin                  | 3922-90-5  | 687.9 | C <sub>35</sub> H <sub>61</sub> NO <sub>12</sub>                               | 15.5 <sup>c</sup>                    | 1.69 <sup>c</sup>                         | 3.31 7.50 <sup>e</sup><br>8.84 <sup>c</sup> |                      |                  |          |
|                                    | Roxithromycin                 | 80214-83-1 | 837.0 | C <sub>41</sub> H <sub>76</sub> N <sub>2</sub> O <sub>15</sub>                 |                                      | 2.75 <sup>c</sup>                         | 9.17 <sup>c</sup>                           |                      |                  |          |
|                                    | Tylosin                       | 1401-69-0  | 916.1 | C <sub>46</sub> H <sub>77</sub> NO <sub>17</sub>                               | 5 <sup>c</sup>                       | 1.63 <sup>c</sup>                         | 7.73 <sup>c</sup>                           | Loamy sand, sand     | 8.3-128          | 553-7990 |
| <b>Ionophores</b>                  | Salinomycin                   | 53003-10-4 | 751   | C <sub>42</sub> H <sub>70</sub> O <sub>11</sub>                                | 17-905 <sup>m</sup>                  | 8.53 <sup>c</sup><br>5.15 <sup>m</sup>    | 4.5,6.4 <sup>m</sup>                        |                      |                  |          |
|                                    | Monensin                      | 17090-79-8 | 670.9 | C <sub>36</sub> H <sub>62</sub> O <sub>11</sub>                                | 63 <sup>n</sup><br>5-63 <sup>m</sup> | 2.75 <sup>n</sup><br>2.8-4.1 <sup>m</sup> | 6.65 <sup>n</sup><br>6.7 <sup>m</sup>       |                      |                  |          |
|                                    | Narasin                       | 55134-13-9 | 765.0 | C <sub>43</sub> H <sub>72</sub> O <sub>11</sub>                                | 102-681 <sup>m</sup>                 | 4.9-6.2 <sup>m</sup>                      | 7.9 <sup>m</sup>                            |                      |                  |          |
| <b>Aminocoumarins</b>              | Novobiocin                    | 303-81-1   | 612.6 | C <sub>31</sub> H <sub>36</sub> N <sub>2</sub> O <sub>11</sub>                 |                                      | 2.45 <sup>c</sup>                         | 4.3 <sup>c</sup>                            |                      |                  |          |
| <b>Lincosamides</b>                | Lincomycin                    | 154-21-2   | 406.5 | C <sub>18</sub> H <sub>34</sub> N <sub>2</sub> O <sub>6</sub> S                | 927 <sup>c</sup>                     | 0.56 <sup>c</sup>                         |                                             |                      |                  |          |
| <b>Chloramphenicol derivatives</b> | Florfenicol                   | 73231-34-2 | 358.2 | C <sub>12</sub> H <sub>14</sub> Cl <sub>2</sub> FN <sub>4</sub> S              |                                      | -0.04 <sup>o</sup>                        | -                                           |                      |                  |          |
|                                    | Chloramphenicol               | 154-75-2   | 323.1 | C <sub>11</sub> H <sub>12</sub> Cl <sub>2</sub> FN <sub>2</sub> O <sub>5</sub> | 2500 <sup>c</sup>                    | 1.14 <sup>c</sup>                         |                                             | Fresh water sediment | 0.4 <sup>j</sup> |          |

<sup>a</sup> K<sub>ow</sub>: the octanol-water partition coefficient; <sup>b</sup> pK<sub>a</sub>: acidity constant; <sup>c</sup> U.S. National Library of Medicine ChemIDPlus Advanced.

(<http://chem.sis.nlm.nih.gov/chemidplus/>), accessed on 10 September, 2011; <sup>d</sup> [10]; <sup>e</sup> [11]; <sup>f</sup> [12]; <sup>g</sup> [13]; <sup>h</sup> [14]; <sup>i</sup> [15]; <sup>j</sup> [16]; <sup>k</sup> [17]; <sup>l</sup> [18]; <sup>m</sup> [19]; <sup>n</sup> [20]; <sup>o</sup> [21].

**Table S6** Details of antibiotics and their MRM parameters in RRLC-MS/MS

| Analyte                                              | Abbr. <sup>a</sup> | Supplier        | M.W.  | CAS          | R.T. <sup>b</sup><br>(min) | MRM-transitions<br><sup>c</sup>   | Fragmentor<br>(V) | CE <sup>d</sup><br>(eV) |
|------------------------------------------------------|--------------------|-----------------|-------|--------------|----------------------------|-----------------------------------|-------------------|-------------------------|
| <b>ESI+</b>                                          |                    |                 |       |              |                            |                                   |                   |                         |
| <b>Sulfonamides</b>                                  |                    |                 |       |              |                            |                                   |                   |                         |
| Sulfacetamide                                        | SAs<br>SCT         | Dr.Ehrenstorfer | 214.2 | 144-80-9     | 0.79                       | <u>215→91.8</u><br>215→155.9      | 40<br>40          | 28<br>14                |
| Sulfachloryridazine                                  | SCP                | Dr.Ehrenstorfer | 284.7 | 80-32-0      | 2.79                       | <u>284.8→155.8</u><br>284.8→107.9 | 40<br>40          | 19<br>32                |
| Sulfadiazine                                         | SDZ                | Dr.Ehrenstorfer | 250.3 | 68-35-9      | 0.91                       | <u>250.9→155.7</u><br>250.9→92    | 40<br>40          | 20<br>32                |
| Sulfadoxine                                          | SDO                | Dr.Ehrenstorfer | 310.3 | 2447-57-6    | 3.51                       | <u>310.9→155.9</u><br>310.9→107.9 | 60<br>60          | 26<br>33                |
| Sulfadimethoxine                                     | SDM                | Dr.Ehrenstorfer | 310.3 | 122-11-2     | 5.86                       | <u>310.8→155.9</u><br>310.8→107.9 | 100<br>100        | 27<br>33                |
| Sulfamethazine                                       | SMZ                | Dr.Ehrenstorfer | 278.3 | 57-68-1      | 1.83                       | <u>279→185.9</u><br>279→155.9     | 75<br>75          | 23<br>25                |
| Sulfathiazole                                        | STZ                | Dr.Ehrenstorfer | 255.3 | 72-14-0      | 1.06                       | <u>256→155.8</u><br>256→91.8      | 90<br>90          | 18<br>30                |
| Sulfamethoxazole                                     | SMX                | Dr.Ehrenstorfer | 253.3 | 723-46-6     | 3.42                       | <u>253.9→155.9</u><br>253.9→107.9 | 90<br>90          | 22<br>30                |
| Sulfamethoxazole-D <sub>4</sub><br>(IS) <sup>e</sup> | SMX-D <sub>4</sub> | Dr.Ehrenstorfer | 257.3 | 1020719-86-1 | 3.36                       | <u>258.1→159.9</u><br>258.1→111.9 | 90<br>90          | 20<br>32                |
| Sulfamerazine                                        | SMR                | Dr.Ehrenstorfer | 264.3 | 127-79-7     | 1.31                       | <u>264.8→92.1</u><br>264.8→108.2  | 70<br>70          | 34<br>33                |
| Sulfamerazine-D <sub>4</sub>                         | SMR-D <sub>4</sub> | TRC             | 268.3 |              | 1.28                       | <u>269→159.9</u><br>269→109.8     | 70<br>70          | 21<br>27                |
| Sulfamonomethoxine                                   | SMM                | Dr.Ehrenstorfer | 280.3 | 1220-83-3    | 2.70                       | <u>281.2→155.8</u><br>281.2→107.8 | 110<br>110        | 24<br>31                |
| Sulfapyridine                                        | SPD                | Dr.Ehrenstorfer | 249.3 | 144-83-2     | 1.45                       | <u>249.9→155.9</u><br>249.9→92.1  | 60<br>60          | 21<br>33                |
| Sulfaquinoxaline                                     | SQX                | Dr.Ehrenstorfer | 300.4 | 59-40-5      | 6.11                       | <u>300.9→91.8</u><br>301.3→107.9  | 90<br>90          | 31<br>32                |

|                                      |                     |                 |        |             |      |                                   |            |          |
|--------------------------------------|---------------------|-----------------|--------|-------------|------|-----------------------------------|------------|----------|
| Sulfisoxazole                        | SX                  | Dr.Ehrenstorfer | 267.3  | 127-69-5    | 4.15 | <u>268→156.0</u><br>268→112.9     | 90<br>90   | 17<br>21 |
| <b>Tetracyclines</b>                 | TCs                 |                 |        |             |      |                                   |            |          |
| Chlortetracycline                    | CTC                 | Dr.Ehrenstorfer | 478    | 57-62-5     | 5.08 | <u>479→444</u><br>479→462.1       | 90<br>90   | 27<br>23 |
| Doxycycline                          | DC                  | Dr.Ehrenstorfer | 444.4  | 564-25-0    | 6.50 | <u>445→428.1</u><br>445→410       | 155<br>155 | 22<br>32 |
| Thiabendazole-D <sub>4</sub><br>(IS) | TBD- D <sub>4</sub> | TRC             |        | 71535-97-2  | 1.09 | <u>205.9→134.9</u><br>205.9→178.9 | 180<br>180 | 45<br>35 |
| Oxytetracycline                      | OTC                 | Dr.Ehrenstorfer | 460.4  | 79-57-2     | 1.94 | <u>461.1→426.1</u><br>461.1→443.1 | 80<br>80   | 25<br>17 |
| Tetracycline                         | TC                  | Dr.Ehrenstorfer | 444.4  | 60-54-8     | 2.47 | <u>445.1→410.0</u><br>445.1→426.8 | 80<br>80   | 26<br>17 |
| Tetracycline- D <sub>6</sub> (IS)    | TC-D <sub>6</sub>   | TRC             | 450.5  |             | 2.46 | <u>451.3→416</u><br>451.3→114     | 65<br>65   | 26<br>16 |
| <b>Fluoroquinolones</b>              | FQs                 |                 |        |             |      |                                   |            |          |
| Ciprofloxacin                        | CFX                 | Dr.Ehrenstorfer | 331.3  | 85721-33-1  | 2.14 | <u>331.9→314</u><br>331.9→288.1   | 95<br>95   | 26<br>24 |
| Ciprofloxacin-D <sub>8</sub> (IS)    | CFX-D <sub>8</sub>  | Dr.Ehrenstorfer |        |             | 2.12 | <u>340.1→322</u><br>340.1→296.1   | 95<br>95   | 30<br>26 |
| Danofloxacin                         | DAN                 | Dr.Ehrenstorfer | 357.4  | 112398-08-0 | 2.64 | <u>358→340.1</u><br>358→314       | 90<br>90   | 31<br>25 |
| Difloxacin                           | DIF                 | Dr.Ehrenstorfer | 399.4  | 98106-17-3  | 3.96 | <u>400.2→356</u><br>400.2→381.9   | 90<br>90   | 24<br>27 |
| Enrofloxacin                         | EFX                 | Dr.Ehrenstorfer | 359.4  | 93106-60-6  | 2.90 | <u>360→316.2</u><br>360→342       | 100<br>100 | 27<br>28 |
| Enrofloxacin-D <sub>5</sub> (IS)     | EFX- D <sub>5</sub> | Dr.Ehrenstorfer | 364.4  |             | 2.87 | <u>365.1→321.1</u><br>365.1→347.1 | 70<br>70   | 36<br>30 |
| Fleroxacin                           | FL                  | Dr.Ehrenstorfer | 369.34 | 79660-72-3  | 1.91 | <u>370.1→326</u><br>370.1→268.9   | 115<br>115 | 25<br>36 |
| Norfloxacin                          | NFX                 | Dr.Ehrenstorfer | 319.3  | 70458-96-7  | 1.93 | <u>320→301.8</u><br>320→276       | 120<br>120 | 26<br>23 |
| Lomefloxacin                         | LFX                 | Dr.Ehrenstorfer | 351.3  | 98079-51-7  | 2.52 | <u>351.8→265</u><br>351.8→308     | 90<br>90   | 30<br>22 |

|                                                      |                                     |                 |       |             |      |                    |     |    |
|------------------------------------------------------|-------------------------------------|-----------------|-------|-------------|------|--------------------|-----|----|
| Marbofloxacin                                        | MAR                                 | Dr.Ehrenstorfer | 362.4 | 115550-35-1 | 1.64 | <u>363→72</u>      | 95  | 26 |
|                                                      |                                     |                 |       |             |      | 363→319.9          | 95  | 21 |
| Ofloxacin                                            | OFX                                 | Dr.Ehrenstorfer | 361.3 | 82419-36-1  | 1.97 | <u>362→261</u>     | 124 | 35 |
|                                                      |                                     |                 |       |             |      | 362→318.1          | 124 | 26 |
| Pefloxacin                                           | PEF                                 | Dr.Ehrenstorfer | 333.4 | 70458-92-3  | 2.59 | <u>334→290</u>     | 120 | 26 |
|                                                      |                                     |                 |       |             |      | 334→316            | 120 | 26 |
| Sarafloxacin                                         | SAR                                 | Dr.Ehrenstorfer | 385.4 | 98105-99-8  | 3.79 | <u>386.1→368</u>   | 140 | 27 |
|                                                      |                                     |                 |       |             |      | 386.1→342.1        | 140 | 26 |
| Carbadox                                             | CAR                                 | Dr.Ehrenstorfer | 262.2 | 6804-7-5    | 1.51 | <u>263.3→129.0</u> | 68  | 27 |
|                                                      |                                     |                 |       |             |      | 263.3→231.1        | 68  | 17 |
| <b>Macrolides</b>                                    | MLs                                 |                 |       |             |      |                    |     |    |
| Azithromycin                                         | ATM                                 | Dr.Ehrenstorfer | 749.0 | 830905-01-5 | 7.59 | <u>749.5→158.2</u> | 64  | 40 |
|                                                      |                                     |                 |       |             |      | 749.5→591.5        | 64  | 30 |
| Clarithromycin                                       | CTM                                 | Dr.Ehrenstorfer | 748.0 | 81103-11-9  | 7.59 | <u>748.9→158.2</u> | 95  | 37 |
|                                                      |                                     |                 |       |             |      | 748.9→590.6        | 95  | 29 |
| Erythromycin-H <sub>2</sub> O                        | ETM-H <sub>2</sub> O                | TRC             | 715.9 | 23893-13-2  | 7.44 | <u>716.6→158.3</u> | 85  | 42 |
|                                                      |                                     |                 |       |             |      | 716.6→558.5        | 85  | 21 |
| Erythromycin- <sup>13</sup> C-D <sub>3</sub><br>(IS) | ETM- <sup>13</sup> C-D <sub>3</sub> | TRC             |       |             | 7.44 | <u>720.7→162.4</u> | 97  | 42 |
|                                                      |                                     |                 |       |             |      | 720.7→562.5        | 97  | 22 |
| Leucomycin                                           | LCM                                 | Dr.Ehrenstorfer | 771   | 1392-21-8   | 7.46 | <u>772.7→109.1</u> | 132 | 63 |
|                                                      |                                     |                 |       |             |      | 772.7→174.2        | 132 | 44 |
| Oleandomycin                                         | ODM                                 | Dr.Ehrenstorfer | 687.9 | 3922-90-5   | 7.67 | <u>689→158.1</u>   | 100 | 42 |
|                                                      |                                     |                 |       |             |      | 689→544            | 100 | 28 |
| Roxithromycin                                        | RTM                                 | Dr.Ehrenstorfer | 837.0 | 80214-83-1  | 7.63 | <u>837.8→158.1</u> | 102 | 47 |
|                                                      |                                     |                 |       |             |      | 837.8→679.8        | 102 | 29 |
| Tylosin                                              | TYL                                 | Dr.Ehrenstorfer | 916.1 | 1401-69-0   | 7.26 | <u>916.7→174.3</u> | 141 | 55 |
|                                                      |                                     |                 |       |             |      | 916.7→772.4        | 141 | 41 |
| <b>Ionophores</b>                                    | IPs                                 |                 |       |             |      |                    |     |    |
| Salinomycin                                          | SAL                                 | Dr.Ehrenstorfer | 751   | 53003-10-4  | 9.99 | <u>773.6→431.4</u> | 160 | 68 |
|                                                      |                                     |                 |       |             |      | 773.6→265.2        | 160 | 70 |
| Narasin                                              | NAR                                 | TRC             | 765.0 | 55134-13-9  | 10.2 | <u>787.7→431.6</u> | 175 | 69 |
|                                                      |                                     |                 |       |             |      | 787.7→531.5        | 175 | 62 |
| Monensin                                             | MON                                 | Dr.Ehrenstorfer | 670.9 | 17090-79-8  | 10.0 | <u>693.5→675.7</u> | 170 | 52 |
|                                                      |                                     |                 |       |             |      | 693.5→479.4        | 170 | 70 |

| <b>Others</b>                    |                    |                 |       |            |      |                    |     |    |
|----------------------------------|--------------------|-----------------|-------|------------|------|--------------------|-----|----|
| Trimethoprim                     | TMP                | Dr.Ehrenstorfer | 290.3 | 738-70-5   | 1.71 | <u>291.1→122.9</u> | 150 | 31 |
|                                  |                    |                 |       |            |      | 291.2→230.1        | 150 | 31 |
| Trimethoprim-D <sub>3</sub> (IS) | TMP-D <sub>3</sub> | TRC             |       |            | 1.66 | <u>294.4→123.1</u> | 150 | 30 |
|                                  |                    |                 |       |            |      | 294.4→230.0        | 150 | 47 |
| Lincomycin                       | LIN                | Dr.Ehrenstorfer | 406.5 | 154-21-2   | 1.23 | <u>407.5→126.1</u> | 80  | 32 |
|                                  |                    |                 |       |            |      | 407.5→359.1        | 80  | 26 |
| Lincomycin-d <sub>3</sub>        | LIN-D <sub>3</sub> | TRC             |       |            | 1.23 | <u>410.6→129.1</u> | 80  | 30 |
|                                  |                    |                 |       |            |      | 410.6→362.2        | 90  | 25 |
| <b>ESI-</b>                      |                    |                 |       |            |      |                    |     |    |
| Florfenicol                      | FF                 | Dr.Ehrenstorfer | 358.2 | 73231-34-2 | 2.92 | <u>355.7→335.8</u> | 60  | 12 |
|                                  |                    |                 |       |            |      | 355.7→184.5        | 60  | 25 |
| Chloramphenicol                  | CAP                | Dr.Ehrenstorfer | 323.1 | 154-75-2   | 3.63 | <u>320.8→152</u>   | 40  | 21 |
|                                  |                    |                 |       |            |      | 320.8→256.8        | 40  | 15 |
| Chloramphenicol-d <sub>5</sub>   | CAP-D <sub>5</sub> | Dr.Ehrenstorfer | 328.1 |            | 3.61 | <u>325.7→156.8</u> | 55  | 23 |
|                                  |                    |                 |       |            |      | 325.7→261.8        | 55  | 16 |

<sup>a</sup> Abbreviation. <sup>b</sup> Retention time. <sup>c</sup> The selected ions for the antibiotic compounds were [M+H]<sup>+</sup>, except ionophore compounds ([M+Na]<sup>+</sup>), florfenicol and chlormphenicol ([M-H]<sup>-</sup>). The underlined MRM transitions were used for quantification. <sup>d</sup> Collision energy. <sup>e</sup>Internal standard.

**Table S7** Recoveries (n = 3), method detection limits (MDLs), and method quantitation limits (MQLs) of the antibiotics from surface water and sediment.

| Analyte | IS <sup>a</sup>     | Surface water         |           |                       |             |             | Sediment                     |                  |                  |           |             |             |
|---------|---------------------|-----------------------|-----------|-----------------------|-------------|-------------|------------------------------|------------------|------------------|-----------|-------------|-------------|
|         |                     | 10 ng/L               | 100 ng/L  | Matrix%               | MDLs (ng/L) | MQLs (ng/L) | 10 ng/g                      | 50 ng/g          | 100 ng/g         | Matrix%   | MDLs (ng/L) | MQLs (ng/L) |
| SCT     | SMX-D <sub>4</sub>  | 102±8.56 <sup>b</sup> | 87±11.6   | 101±3.54 <sup>c</sup> | 0.21        | 0.70        | <b>46.8±10.8<sup>d</sup></b> | <b>30.8±5.52</b> | <b>30.1±4.51</b> | 119±3.93  | 0.28        | 0.93        |
| SCP     | SMX-D <sub>4</sub>  | 108±5.16              | 114±3.39  | 140±2.82              | 0.30        | 1.00        | 110±14.1                     | 123±9            | 133±11.9         | 125±4.54  | 0.24        | 0.80        |
| SDZ     | SMR-D <sub>4</sub>  | 106±4.78              | 93.1±6.21 | 112±1.98              | 0.07        | 0.24        | 101±2.36                     | 95.4±20.1        | 78.5±16.1        | 89.5±9.32 | 0.12        | 0.41        |
| SDO     | SMX-D <sub>4</sub>  | 103±5.88              | 105±4.09  | 110±4.81              | 0.14        | 0.48        | 115±7.3                      | 101±5.4          | 97±4.3           | 93.0±1.4  | 0.09        | 0.30        |
| SDM     | SMX-D <sub>4</sub>  | 114±5.83              | 123±5.11  | 126±5.66              | 0.12        | 0.41        | 125±10.8                     | 112±4.73         | 105±3            | 92.4±1.6  | 0.07        | 0.23        |
| SMR     | SMR-D <sub>4</sub>  | 90.1±3.21             | 85.7±7.75 | 95.1±1.56             | 0.16        | 0.55        | 86.7±11.5                    | 84.0±6.15        | 66.7±1.89        | 70.2±5.05 | 0.12        | 0.40        |
| SMZ     | SMR-D <sub>4</sub>  | 139±2.87              | 122±8.26  | 149±0.42              | 0.12        | 0.39        | 117±15.1                     | 135±17.5         | 120±4.19         | 123±8.66  | 0.16        | 0.53        |
| SMX     | SMX-D <sub>4</sub>  | 149±12.7              | 133±10.2  | 99.6±1.7              | 0.17        | 0.57        | 78.8±3.79                    | 77.5±2.46        | 75.2±2.02        | 83.5±4.09 | 0.27        | 0.91        |
| SMM     | SMX-D <sub>4</sub>  | 100±5.14              | 101±3.12  | 120±3.68              | 0.26        | 0.87        | 102±13.1                     | 102±6.82         | 104±9.54         | 108±1.01  | 0.29        | 0.97        |
| SPD     | SMR-D <sub>4</sub>  | 80.1±8.06             | 83±5.18   | 102±2.12              | 0.13        | 0.43        | 95.7±7.78                    | 61.1±10.9        | 66.8±8.81        | 77.8±6.22 | 0.11        | 0.35        |
| SQX     | SMX-D <sub>4</sub>  | 117±6.94              | 118±11.8  | 87±4.24               | 0.14        | 0.45        | 69.7±3.69                    | 70.1±3.25        | 67.8±4.54        | 74.3±1.51 | 0.05        | 0.18        |
| SX      | SMX-D <sub>4</sub>  | 120±5.07              | 110±11.8  | 101±5.66              | 0.23        | 0.76        | 109±8.74                     | 105±1.15         | 101±0.76         | 94.9±1.7  | 0.14        | 0.46        |
| STZ     | SMR-D <sub>4</sub>  | 102±3.17              | 92.4±6.83 | 124±0.28              | 0.20        | 0.66        | 97.3±14.2                    | 119±10.7         | 94.8±15.3        | 86.1±5.33 | 0.11        | 0.36        |
| TMP     | TMP-D <sub>3</sub>  | 102±6.9               | 91.6±7.38 | 104±1.56              | 0.04        | 0.15        | 94.3±4.48                    | 104±14.9         | 90.5±3.97        | 70.6±8.05 | 0.13        | 0.43        |
| CTC     | TC-D <sub>6</sub>   | 95.9±5.48             | 88.3±9.01 | 87.3±1.84             | 0.82        | 2.74        | 106±14.                      | 122±27.5         | 96.0±11.5        | 73.1±3.53 | 0.91        | 3.04        |
| DC      | TC-D <sub>6</sub>   | 96.6±9.84             | 89.9±15.5 | 86.9±2.12             | 0.29        | 0.95        | 103±12.8                     | 119±18.5         | 88.7±14.5        | 58.3±4    | 0.07        | 0.25        |
| OTC     | TC-D <sub>6</sub>   | 135±14.4              | 118±10.8  | 91.5±8.06             | 0.30        | 1.00        | 101±12.4                     | 91.2±11.2        | 93.0±9.73        | 108±10.3  | 0.80        | 2.65        |
| TC      | TC-D <sub>6</sub>   | 105±7.51              | 106±13.9  | 99.4±0.28             | 0.68        | 2.28        | 89.5±15.9                    | 82.9±3.44        | 89.7±4.48        | 101±1.94  | 1.00        | 3.34        |
| CFX     | CFX-D <sub>8</sub>  | 112±11.4              | 87.8±7.74 | 116±5.8               | 1.00        | 3.33        | 145±19.2                     | 96.7±4.33        | 102±9.19         | 99.3±3.24 | 0.78        | 2.59        |
| DAN     | EFX- D <sub>5</sub> | 81.9±21               | 66.4±5.07 | 74.8±6.11             | 0.32        | 1.07        | 113±17.8                     | 113±14.3         | 112±10.6         | 65.2±3.2  | 1.56        | 5.21        |
| DIF     | EFX- D <sub>5</sub> | 119±7.59              | 94.2±4.16 | 125±4.62              | 0.95        | 3.17        | 154±13.9                     | 149±21.8         | 137±7.11         | 107±6.73  | 0.76        | 2.54        |
| EFX     | EFX- D <sub>5</sub> | 101±9.07              | 85.6±3.26 | 110±1.76              | 0.66        | 2.19        | <b>222±27.6</b>              | 111±2.91         | 103±9.11         | 91.5±2.13 | 0.50        | 1.65        |
| FL      | EFX- D <sub>5</sub> | 85.8±13.1             | 79.8±7.09 | 120±5.08              | 0.62        | 2.06        | 147±14.6                     | 155±19.6         | 147±13.7         | 171±5.26  | 0.81        | 2.70        |
| LFX     | EFX- D <sub>5</sub> | 79.2±13.0             | 76.9±10.1 | 119±2.72              | 0.71        | 2.38        | <b>249±7.6</b>               | <b>158±23.3</b>  | <b>188±11.4</b>  | 108±11.8  | 0.35        | 1.18        |
| MAR     | EFX- D <sub>5</sub> | 70.6±13.1             | 68.3±5.89 | 101±2.44              | 0.50        | 1.66        | 94.1±14.3                    | 75.4±10.4        | 80.3±19.2        | 140±4.49  | 0.68        | 2.27        |
| NFX     | CFX-D <sub>8</sub>  | 111±7.15              | 72.7±4.1  | 98.4±3.34             | 0.94        | 3.13        | 113±26.7                     | 96.2±9.12        | 84.6±11.5        | 110±3.08  | 0.77        | 2.56        |
| OFX     | EFX- D <sub>5</sub> | 77.3±16.6             | 75.4±3.47 | 91.7±2.97             | 0.47        | 1.56        | <b>212±19.8</b>              | 130±5.55         | 116±21.8         | 117±1.22  | 0.33        | 1.09        |

|                      |                                     |                  |           |           |      |      |                  |           |                 |           |      |      |
|----------------------|-------------------------------------|------------------|-----------|-----------|------|------|------------------|-----------|-----------------|-----------|------|------|
| PEF                  | EFX- D <sub>5</sub>                 | 104±14.2         | 86.4±3.59 | 106±5.29  | 0.80 | 2.68 | 103±6.67         | 94.4±22.3 | 77.0±4.34       | 79.7±2.78 | 0.87 | 2.92 |
| SAR                  | CFX-D <sub>8</sub>                  | 121±8.61         | 79.7±3.45 | 125±0.21  | 0.86 | 2.86 | 96.3±3.18        | 91.3±0.25 | 78.4±5.15       | 93.2±8.63 | 0.73 | 2.43 |
| CAR                  | TBD-D <sub>4</sub>                  | 75.7±5.5         | 68±9.25   | 67±4.92   | 1.22 | 4.29 | 124±6            | 102±7.02  | 92.1±19.1       | 64.5±3.3  | 0.85 | 2.84 |
| ATM                  | ETM- <sup>13</sup> C-D <sub>3</sub> | 89.4±10.1        | 76.8±8.56 | 132±0.73  | 0.52 | 1.73 | <b>43.2±6.93</b> | 111±19.4  | 108±16.7        | 63±5.8    | 0.29 | 0.97 |
| CTM                  | ETM- <sup>13</sup> C-D <sub>3</sub> | 54.1±3.74        | 87.7±8.29 | 117±4.30  | 0.30 | 1.00 | 87.8±11.2        | 81.5±18.2 | 104±21.3        | 79.3±7.1  | 0.54 | 1.79 |
| ETM-H <sub>2</sub> O | ETM- <sup>13</sup> C-D <sub>3</sub> | 56.4±2.31        | 53.1±3.42 | 141±3.64  | 0.36 | 1.19 | 85.1±13.5        | 65.3±11.2 | 99.0±11.0       | 83.9±4.77 | 0.72 | 2.41 |
| LCM                  | ETM- <sup>13</sup> C-D <sub>3</sub> | 63.7±9.47        | 71.4±7.10 | 110±8.90  | 0.48 | 1.59 | 61.1±10.1        | 65.8±11.2 | 86.0±3.2        | 79.9±4.14 | 0.50 | 1.65 |
| ODM                  | ETM- <sup>13</sup> C-D <sub>3</sub> | 60.2±5.17        | 54.6±8.95 | 135±8.27  | 0.08 | 0.26 | 60.8±11.3        | 119±9.33  | 105±12.7        | 67.2±10.5 | 0.23 | 0.77 |
| RTM                  | ETM- <sup>13</sup> C-D <sub>3</sub> | 82.7±3.87        | 84.8±5.11 | 98.4±2.38 | 0.19 | 0.62 | 57.6±11.5        | 86.5±12.5 | 96.1±12.9       | 101±4.32  | 0.74 | 2.47 |
| TYL                  | ETM- <sup>13</sup> C-D <sub>3</sub> | 57.3±6.69        | 95.8±7.59 | 140±8.90  | 0.42 | 1.40 | 96.7±6.75        | 91.7±19.5 | 117±21          | 60.2±0.88 | 1.40 | 4.65 |
| SAL                  | TBD-D <sub>4</sub>                  | <b>45.7±6.53</b> | 78.8±16.8 | 79.3±3.76 | 1.13 | 3.77 | <b>44.0±7.72</b> | 141±16.3  | <b>190±47.3</b> | 112±1.16  | 1.94 | 6.45 |
| NAR                  | TBD-D <sub>4</sub>                  | 58.6±5.28        | 85.1±19.6 | 102±13.1  | 0.60 | 2.00 | 80 ±17           | 81.5±6.17 | 84.6±20.5       | 80±1.32   | 0.54 | 1.81 |
| MON                  | TBD-D <sub>4</sub>                  | 64.9±5.17        | 71.4±7.10 | 85.7±5.18 | 0.41 | 1.36 | <b>36.8±6.51</b> | 76.7±8.73 | 135±28.8        | 75.8±6.35 | 0.76 | 2.54 |
| LIN                  | LIN-D <sub>3</sub>                  | 123±2.21         | 110±7.32  | 126±6.36  | 0.56 | 1.86 | 127±20.9         | 81.8±9.45 | 102±24.6        | 98.2±1.93 | 1.26 | 4.20 |
| FF                   | CAP-D <sub>5</sub>                  | 79.7±4.79        | 71.4±3.6  | 88.3±3.12 | 0.08 | 0.26 | 100±3.5          | 88.5±3.02 | 94.5±1.13       | 95.4±3.24 | 0.10 | 0.34 |
| CAP                  | CAP-D <sub>5</sub>                  | 103±10.5         | 97.3±10.9 | 96.4±2.31 | 0.28 | 0.94 | 96.8±3.55        | 88.7±3.06 | 95.2±1.14       | 102±2.99  | 0.05 | 0.18 |

<sup>a</sup> Internal standards. <sup>b</sup> Mean(%)±standard deviation (%). <sup>c</sup>>100% means matrix enhancement effect, <100% means matrix suppression effect. <sup>d</sup> Bold letters in the table represent those recoveries or matrix effect outside the range of 50-150%.



**Table S8** Mass balance of antibiotics in the surface water and sediment of Lake Taihu in summer and winter

| Site | Summer             |                       | Winter             |                       |
|------|--------------------|-----------------------|--------------------|-----------------------|
|      | Mass in water (kg) | Mass in sediment (kg) | Mass in water (kg) | Mass in sediment (kg) |
| S1   | 3.06               | 117                   | 7.44               | 46.8                  |
| S2   | 4.05               | 66.2                  | 5.95               | 37.9                  |
| S3   | 4.59               | 35.9                  | 6.10               | 26.5                  |
| S4   | 4.84               | 40.1                  | 8.17               | 64.9                  |
| S5   | 8.25               | 29.9                  | 5.89               | 33.5                  |
| S6   | 13.7               | 128                   | 25.8               | 1,520                 |
| S7   | 28.7               | 123                   | 31.6               | 666                   |
| S8   | 64.3               | 90.8                  | 88.5               | 550                   |
| S9   | 0.20               | 14.9                  | 0.17               | 21.3                  |
| S10  | 32.0               | 879                   | 158                | 891                   |
| S11  | 22.3               | 181                   | 18.9               | 305                   |
| S12  | 5.21               | 46.5                  | 8.43               | 210                   |
| S13  | 25.7               | 124                   | 37.3               | 1,330                 |
| S14  | 53.7               | 170                   | 38.9               | 986                   |
| S15  | 0.25               | 10.3                  | 0.12               | 89.3                  |
| S16  | 21.2               | 951                   | 434                | 1,830                 |
| S17  | 19.2               | 329                   | 93.0               | 205                   |
| S18  | 64.1               | 116                   | 66.5               | 139                   |
| S19  | 27.6               | 251                   | 27.6               | 432                   |
| S20  | 24.1               | 108                   | 41.5               | 303                   |
| S21  | 54.6               | 98.1                  | 46.7               | 2,700                 |
| S22  | 18.6               | 45.6                  | 18.1               | 82.7                  |
| S23  | 22.5               | 45.7                  | 16.8               | 221                   |
| S24  | 14.0               | 36.0                  | 46.8               | 51.2                  |
| S25  | 1.59               | 145                   | 2.75               | 40.1                  |

|                        |      |                 |       |        |
|------------------------|------|-----------------|-------|--------|
| S26                    | 11.1 | 133             | 7.79  | 189    |
| S27                    | 13.3 | 35.7            | 6.93  | 37.4   |
| S28                    | 8.13 | -- <sup>c</sup> | 5.19  | --     |
| S29                    | 27.6 | 10.2            | 19.7  | --     |
| S30                    | 19.4 | 0.00            | 14.5  | 37.4   |
| S31                    | 21.0 | 1.42            | 26.7  | 120    |
| S32                    | 11.2 | 5.65            | 16.8  | 213    |
| All of the entire lake | 650  | 4,370           | 1,330 | 13,400 |

<sup>a</sup> Mass of antibiotics in the water around each site (kg)=total concentrations of antibiotics in the aqueous phase (ng/L)×water depth (m)×water area(m<sup>2</sup>)/1000,000,000; and the water depth and weighted water area at each site were provided in Table S2. <sup>b</sup> Mass of antibiotics in the sediment around each site (kg)=total concentrations of antibiotics in the sedimentary phase (ng/g)×sediment depth (m)×water area(m<sup>2</sup>) ×sediment density (g/cm<sup>3</sup>)×water content of sediment (%)/1000,000; and sediment depth 0.2 m, sediment density 1.3 g/cm<sup>3</sup>, water content of sediment 50% were used and cited from Qin, 2008. <sup>22</sup> <sup>c</sup> not available, because sediment samples at site S28 in summer were not sampled due to lush aquatic plants and thin sedimentary deposit thickness.

**Table S9** Pseudo-distribution coefficient of antibiotics in Lake Taihu during two seasons

| Site | SDO  |                 | SMZ             |     | SMX  | SMM  |      | SPD | TMP  |      | TC    | DC   | DNA  | DIF  |      | EFX  |      | FL   | LFX  | MAR  |      | NFX  | OFX  |      | PEF  | SAR  | ETM-H2O | RTM  | FF  |      |
|------|------|-----------------|-----------------|-----|------|------|------|-----|------|------|-------|------|------|------|------|------|------|------|------|------|------|------|------|------|------|------|---------|------|-----|------|
|      | May  | Nov             | May             | Nov | May  | May  | Nov  | May | May  | Nov  | May   | Nov  | Nov. | May  | Nov. | May  | Nov. | May  | Nov. | May  | May  | Nov. | May  | May  | Nov. | May  | May     | May  | May | Nov  |
| S1   | 7.77 | -- <sup>a</sup> | -- <sup>a</sup> | --  | --   | --   | --   | --  | 156  | --   | 10000 | --   | --   | 3100 | 31.4 | 5800 | --   | 1310 | 44.6 | --   | 1370 | --   | 5440 | 5500 | 212  | 2990 | 6510    | --   | --  | 3.17 |
| S2   | 5.84 | --              | --              | --  | --   | --   | --   | --  | 123  | --   | --    | --   | --   | --   | --   | --   | --   | 353  | --   | --   | --   | --   | --   | 538  | --   | 3380 | --      | --   | --  |      |
| S3   | 21.2 | --              | --              | --  | --   | --   | --   | --  | 86.7 | --   | --    | --   | --   | --   | --   | --   | --   | --   | --   | --   | --   | --   | 699  | --   | --   | --   | --      | --   | --  |      |
| S4   | 18.9 | --              | --              | --  | --   | --   | --   | --  | 62.1 | --   | --    | --   | --   | --   | --   | 753  | --   | --   | --   | --   | --   | --   | --   | --   | --   | --   | --      | --   | --  |      |
| S5   | 4.32 | --              | --              | --  | --   | --   | --   | --  | 89.2 | --   | --    | --   | --   | --   | --   | 753  | --   | --   | --   | 75.6 | --   | --   | --   | --   | --   | --   | --      | --   | --  |      |
| S6   | --   | --              | --              | --  | --   | --   | --   | --  | 62.1 | --   | --    | --   | --   | --   | --   | 753  | --   | --   | 776  | --   | --   | --   | --   | --   | --   | --   | --      | --   | --  |      |
| S7   | --   | --              | --              | --  | --   | --   | --   | --  | 73.4 | --   | --    | --   | --   | --   | 729  | 753  | --   | --   | 2590 | --   | --   | --   | --   | --   | --   | --   | --      | --   | --  |      |
| S8   | --   | --              | --              | --  | --   | --   | --   | --  | --   | --   | --    | --   | --   | --   | --   | --   | --   | --   | --   | --   | --   | --   | --   | --   | --   | --   | --      | --   | --  |      |
| S9   | --   | --              | --              | --  | --   | --   | --   | --  | --   | --   | --    | --   | --   | --   | --   | --   | --   | --   | --   | --   | --   | --   | --   | --   | --   | --   | --      | --   | --  |      |
| S10  | --   | --              | 57.6            | --  | --   | 71.9 | --   | --  | 63.0 | 40.6 | --    | --   | --   | --   | --   | --   | --   | --   | 63.3 | --   | --   | --   | --   | --   | --   | --   | --      | --   | --  |      |
| S11  | --   | --              | --              | --  | --   | --   | --   | --  | --   | --   | --    | --   | --   | --   | --   | --   | --   | --   | 152  | --   | --   | --   | --   | --   | --   | --   | --      | --   | --  |      |
| S12  | --   | --              | --              | --  | --   | --   | --   | --  | 102  | --   | --    | --   | --   | --   | --   | --   | --   | --   | --   | --   | --   | --   | --   | --   | --   | --   | --      | --   | --  |      |
| S13  | 7.06 | 2.65            | --              | --  | --   | --   | --   | --  | --   | --   | --    | --   | --   | --   | --   | --   | --   | --   | 184  | --   | --   | --   | --   | --   | --   | --   | --      | --   | --  |      |
| S14  | 2.81 | 5.40            | --              | --  | --   | --   | --   | --  | --   | --   | --    | --   | --   | 3200 | --   | 1180 | --   | 2620 | --   | --   | --   | --   | --   | 1530 | --   | --   | 2030    | --   | --  |      |
| S15  | --   | --              | --              | --  | --   | --   | --   | --  | 789  | --   | --    | --   | --   | --   | --   | --   | --   | --   | --   | --   | --   | --   | --   | --   | --   | --   | --      | --   | --  |      |
| S16  | --   | --              | 41.6            | --  | --   | 66.6 | --   | 195 | 93.4 | 14.6 | 347   | 18.4 | --   | 3530 | --   | --   | --   | 388  | --   | --   | 313  | --   | --   | --   | --   | --   | 1810    | 0.18 |     |      |
| S17  | 71.1 | --              | 85.5            | 182 | 21.7 | 88.5 | 26.9 | --  | 133  | 54.2 | --    | 1.87 | --   | --   | --   | --   | --   | --   | --   | --   | --   | --   | --   | --   | --   | --   | --      | --   | 0.5 |      |
| S18  | 2.52 | --              | --              | --  | --   | --   | --   | --  | 114  | --   | --    | --   | --   | --   | --   | --   | --   | --   | --   | --   | --   | --   | --   | --   | --   | --   | --      | --   | --  |      |
| S19  | --   | --              | --              | --  | --   | --   | --   | --  | --   | 489  | --    | --   | --   | --   | --   | --   | --   | --   | --   | --   | --   | --   | --   | --   | --   | --   | --      | --   | --  |      |
| S20  | --   | --              | --              | --  | --   | --   | --   | --  | --   | --   | --    | --   | --   | --   | --   | --   | --   | --   | --   | --   | --   | --   | --   | --   | --   | --   | --      | --   | --  |      |
| S21  | --   | --              | --              | --  | --   | --   | --   | --  | --   | --   | --    | --   | --   | --   | --   | --   | --   | --   | --   | --   | --   | --   | --   | --   | --   | --   | --      | --   | --  |      |
| S22  | --   | --              | --              | --  | --   | --   | --   | --  | --   | --   | --    | --   | --   | --   | --   | --   | --   | --   | --   | --   | --   | --   | --   | --   | --   | --   | --      | --   | --  |      |
| S23  | --   | --              | --              | --  | --   | --   | --   | --  | 236  | --   | --    | --   | --   | --   | --   | --   | --   | --   | --   | --   | --   | --   | --   | --   | --   | --   | --      | --   | --  |      |
| S24  | --   | --              | --              | --  | --   | --   | --   | --  | 299  | --   | --    | --   | --   | --   | --   | --   | --   | --   | --   | --   | --   | --   | --   | --   | --   | --   | --      | --   | --  |      |
| S25  | --   | --              | --              | --  | --   | --   | --   | --  | --   | --   | --    | --   | --   | --   | --   | --   | --   | --   | --   | --   | --   | --   | --   | --   | --   | --   | --      | --   | --  |      |

|     |      |    |    |    |    |    |    |      |    |    |    |    |     |    |    |    |     |    |    |    |    |    |    |    |    |    |    |    |    |    |    |
|-----|------|----|----|----|----|----|----|------|----|----|----|----|-----|----|----|----|-----|----|----|----|----|----|----|----|----|----|----|----|----|----|----|
| S26 | --   | -- | -- | -- | -- | -- | -- | --   | -- | -- | -- | -- | 214 | -- | -- | -- | --  | -- | -- | -- | -- | -- | -- | -- | -- | -- | -- | -- | -- | -- | -- |
| S27 | --   | -- | -- | -- | -- | -- | -- | --   | -- | -- | -- | -- | --  | -- | -- | -- | --  | -- | -- | -- | -- | -- | -- | -- | -- | -- | -- | -- | -- | -- | -- |
| S28 | --   | -- | -- | -- | -- | -- | -- | --   | -- | -- | -- | -- | --  | -- | -- | -- | --  | -- | -- | -- | -- | -- | -- | -- | -- | -- | -- | -- | -- | -- | -- |
| S29 | 2.94 | -- | -- | -- | -- | -- | -- | --   | -- | -- | -- | -- | --  | -- | -- | -- | --  | -- | -- | -- | -- | -- | -- | -- | -- | -- | -- | -- | -- | -- | -- |
| S30 | --   | -- | -- | -- | -- | -- | -- | --   | -- | -- | -- | -- | --  | -- | -- | -- | --  | -- | -- | -- | -- | -- | -- | -- | -- | -- | -- | -- | -- | -- | -- |
| S31 | 2.38 | -- | -- | -- | -- | -- | -- | --   | -- | -- | -- | -- | --  | -- | -- | -- | 574 | -- | -- | -- | -- | -- | -- | -- | -- | -- | -- | -- | -- | -- | -- |
| S32 | 10.1 | -- | -- | -- | -- | -- | -- | 73.9 | -- | -- | -- | -- | --  | -- | -- | -- | --  | -- | -- | -- | -- | -- | -- | -- | -- | -- | -- | -- | -- | -- | -- |

<sup>a</sup> Not available because this antibiotic was not detected in the water or sediment.

**Table S10** Occurrence of antibiotics in aquatic environment in the world

| Compound             | Country      | Location                        | Aqueous phase (ng/L) |         |      | Sediment ( $\mu\text{g}/\text{kg}$ ) |        |      | Reference     |
|----------------------|--------------|---------------------------------|----------------------|---------|------|--------------------------------------|--------|------|---------------|
|                      |              |                                 | Range                | Median  | Mean | Range                                | Median | Mean |               |
| <b>Sulfonamides</b>  |              |                                 |                      |         |      |                                      |        |      |               |
| Sulfacetamide        | China        | Lake Taihu                      | ND-34.9              | 2.24    |      | ND-<MQL                              |        |      | In this study |
|                      | China        | Bosten Lake                     | 11.56-48.26          | 15.41   |      | <MQL-1.25                            | 3.81   |      | [23]          |
|                      | China        | Coastal environment of Dalian   | ND-1.51              | ND      | 0.33 | ND-1.39                              | ND     | 0.13 | [24]          |
|                      | China        | Liao River Basin                | ND-12.25             | ND      | 1.24 | ND                                   |        |      | [25]          |
| Sulfachlorpyridazine | China        | Lake Taihu                      | ND-9.52              | ND      |      | ND                                   |        |      | In this study |
|                      | China        | Lake Taihu                      | ND-89.4              |         | 27.1 | ND-15.8                              |        | 7.3  | [26]          |
|                      | China        | Lake Chaohu                     | ND-4.6               |         |      |                                      |        |      | [27]          |
|                      | China        | Inflowing rivers of Lake Chaohu | ND-1.6               |         |      |                                      |        |      | [18]          |
|                      | China        | Huangpu River                   | 3.2-58.3             |         |      |                                      |        |      | [28]          |
|                      | China        | Coastal environment of Dalian   | ND                   |         |      | ND                                   |        |      | [15]          |
|                      | China        | Liao River Basin                | ND-13.52             | ND      | 0.98 | ND                                   |        |      | [16]          |
|                      | USA          | 139 stream sites                | ND                   |         |      |                                      |        |      | [29]          |
|                      | USA          | Cache La Poudre River           | 30                   |         | 30   | 1.9-3.32                             |        | 2.7  | [30]          |
|                      | Sulfadiazine | China                           | Lake Taihu           | ND-3.14 | 0.72 |                                      | ND     |      |               |
| China                |              | Lake Chaohu                     | ND-45.6              |         |      |                                      |        |      | [18]          |
| China                |              | Inflowing rivers of Lake Chaohu | ND-3.2               |         |      |                                      |        |      | [18]          |
| China                |              | Baiyangdian Lake                | 0.86-505             | 56.0    | 118  | ND-2.07                              | ND     | 0.41 | [31]          |
| China                |              | Bosten Lake                     | 2.88-37.77           | 10.54   |      | <MQL-4.46                            |        |      | [14]          |
| China                |              | Coastal environment of Dalian   | ND-2.05              | ND      | 0.19 | ND-1.68                              | ND     | 0.50 | [15]          |
| China                |              | Huangpu River                   | 1.4-40.6             |         |      |                                      |        |      | [19]          |
| China                |              | Huangpu River                   | 4.9-112.5            |         | 53.6 | 0.07-0.71                            |        | 0.4  | [32]          |
| China                |              | Yangze Estuary                  | 0.3-71.8             |         |      |                                      |        |      | [33]          |

|                  |       |                                              |             |      |       |          |      |      |               |
|------------------|-------|----------------------------------------------|-------------|------|-------|----------|------|------|---------------|
|                  | China | The Yangtze Estuary and nearby coastal areas |             |      |       | ND-0.469 |      |      | [34]          |
|                  | China | Pearl River                                  | ND-336      |      |       |          |      |      | [35]          |
|                  | China | Pearl River                                  | ND-26.9     |      |       |          |      |      | [36]          |
|                  | China | lower reach of the Pearl River               | Up to 18.0  |      |       | ND       |      |      | [37]          |
|                  | China | Victoria Harbour                             | ND          |      |       |          |      |      | [26]          |
|                  | China | Pearl River                                  |             |      |       | ND-83.9  | 3.16 |      | [38]          |
|                  | China | Streams in Jiangnan Plain                    | ND-37.4     |      |       |          |      |      | [39]          |
|                  | China | Hai River                                    | 3.1-52      | 38.8 | 32.7  | ND       |      |      | [40]          |
|                  | China | Laizhou Bay                                  | ND-0.43     | ND   | 0.02  |          |      |      | [41]          |
|                  | China | Jiulongjiang River                           | <0.26-316.2 | 24.2 | 51.38 |          |      |      | [42]          |
|                  | China | Yellow River                                 |             |      |       | ND-22    | ND   |      | [43]          |
|                  | China | Hai River                                    |             |      |       | ND-1.18  | ND   |      | [34]          |
|                  | China | Liao River                                   |             |      |       | ND-11    | ND   |      | [34]          |
|                  | China | Streams with livestock farms                 | 4.57-214    |      |       | ND       |      |      | [44]          |
| Sulfadoxine      | China | Lake Taihu                                   | ND-210      | 7.99 |       | ND-0.59  |      |      | In this study |
|                  | China | Coastal environment of Dalian                | ND-1.88     | ND   | 0.33  | ND       |      |      | [15]          |
| Sulfadimethoxine | China | Lake Taihu                                   | ND          |      |       | ND       |      |      | In this study |
|                  | China | Lake Taihu                                   | ND-43.3     |      | 11.9  | ND-15.7  |      | 6.9  | [17]          |
|                  | China | Lake Chaohu                                  | ND-8.8      |      |       |          |      |      | [18]          |
|                  | China | Inflowing rivers of Lake Chaohu              | <MQL        |      |       |          |      |      | [18]          |
|                  | China | Baiyangdian Lake                             | ND          |      |       | ND-0.20  | ND   | 0.04 | [22]          |
|                  | China | Jiulongjiang River                           | <0.22-1.90  | 0.80 | 0.89  |          |      |      | [33]          |
|                  | China | Coastal environment of Dalian                | ND-2.00     | ND   | 0.13  | ND       |      |      | [15]          |
|                  | China | Liao River Basin                             | ND-5.90     | 0.62 | 0.94  | ND-0.97  | ND   | 0.06 | [16]          |
|                  | Japan | Nationwide survey                            | ND-6.4      | ND   | 0.45  |          |      |      | [45]          |

|                |         |                                              |            |      |       |           |      |      |               |
|----------------|---------|----------------------------------------------|------------|------|-------|-----------|------|------|---------------|
|                | Japan   | Tamagawa River                               | ND         |      |       |           |      |      | [46]          |
|                | Vietnam | Urban drainage                               | ND         |      |       |           |      |      | [37]          |
|                | Vietnam | Mekong River                                 | ND         |      |       |           |      |      | [37]          |
|                | USA     | 139 stream sites                             | Up to 60   |      |       |           |      |      | [20]          |
| Sulfamerazine  | USA     | Cache La Poudre River                        | 10-40      |      | 20    | 1.7-6.8   |      | 3.8  | [21]          |
|                | China   | Baiyangdian Lake                             | ND         |      |       | ND-2.47   | ND   | 0.05 | [22]          |
|                | China   | The Yangtze Estuary and nearby coastal areas |            |      |       | ND-<MQL   |      |      | [25]          |
|                | China   | Huangpu River                                | <MQL       |      |       | 0.03-0.8  |      | 0.2  | [23]          |
|                | China   | Coastal environment of Dalian                | ND         |      |       | ND-3.67   | 2.55 | 1.73 | [15]          |
|                | China   | Liao River Basin                             | ND         |      |       | ND        |      |      | [16]          |
|                | China   | Streams in Jiangnan Plain                    | ND-11.0    |      |       |           |      |      | [30]          |
|                | Japan   | Nationwide survey                            | ND-0.03    | ND   | ND2   |           |      |      | [36]          |
|                | Japan   | Tamagawa River                               | ND         |      |       |           |      |      | [37]          |
|                | USA     | 139 stream sites                             | ND         |      |       |           |      |      | [20]          |
| Sulfamethazine | USA     | Cache La Poudre River                        | 10-60      |      | 20    | 2.3-6.8   |      | 4.8  | [21]          |
|                | China   | Lake Taihu                                   | ND-6.69    | 0.47 |       | ND-0.27   | ND   |      | In this study |
|                | China   | Lake Taihu                                   | ND-654.0   |      | 252.7 | ND-99.8   |      | 39.8 | [17]          |
|                | China   | Lake Chaohu                                  | ND-9.9     |      |       |           |      |      | [18]          |
|                | China   | Inflowing rivers of Lake Chaohu              | <MQL-14.9  |      |       |           |      |      | [18]          |
|                | China   | Baiyangdian Lake                             | ND-16.1    | 2.68 | 5.25  | ND-6.92   | 1.08 | 1.47 | [22]          |
|                | China   | Huangpu River                                | 2.0-623.3  |      |       |           |      |      | [19]          |
|                | China   | Huangpu River                                | 19.9-389.4 |      | 188.9 | 0.2-2.7   |      | 1.2  | [23]          |
|                | China   | Yangze Estuary                               | 0.50-89.1  |      |       |           |      |      | [24]          |
|                | China   | The Yangtze Estuary and nearby coastal areas |            |      |       | <MQL-4.84 |      |      | [25]          |

|                  |         |                                |             |       |        |            |      |      |               |
|------------------|---------|--------------------------------|-------------|-------|--------|------------|------|------|---------------|
|                  | China   | Pearl River                    | ND-323      |       |        |            |      |      | [26]          |
|                  | China   | Pearl River                    | ND-446      |       |        |            |      |      | [27]          |
|                  | China   | Pearl River                    |             |       |        | ND-248     | 19.7 |      | [29]          |
|                  | China   | lower reach of the Pearl River | Up to 218   |       |        | Up to 3.24 |      |      | [28]          |
|                  | China   | Victoria Harbour               | ND          |       |        |            |      |      | [26]          |
|                  | China   | Yellow River                   |             |       |        | ND         |      |      | [34]          |
|                  | China   | Hai River                      |             |       |        | ND-5.67    | ND   |      | [34]          |
|                  | China   | Liao River                     |             |       |        | ND         |      |      | [34]          |
|                  | China   | Hai River                      | ND-53.5     | 30.7  | 27.7   | 0.5-5.8    | 3.1  | 2.9  | [31]          |
|                  | China   | Coastal environment of Dalian  | ND-2.81     | ND    | 0.34   | ND-1.76    | ND   | 0.26 | [15]          |
|                  | China   | Liao River Basin               | ND-15.91    | 2.37  | 3.55   | ND-1.03    | ND   | ND   | [16]          |
|                  | China   | Laizhou Bay                    | ND-1.5      | ND    | 0.13   |            |      |      | [32]          |
|                  | China   | Jiulongjiang River             | <0.28-775.5 | 39.55 | 170.86 |            |      |      | [33]          |
|                  | China   | Streams in Jiangnan Plain      | ND-33.8     |       |        |            |      |      | [30]          |
|                  | China   | Streams with livestock farms   | 63.8-101    |       |        | 4.16-5.34  |      |      | [35]          |
|                  | Japan   | Nationwide survey              | ND-62.9     | ND    | 2.55   |            |      |      | [36]          |
|                  | Japan   | Tamagawa River                 | ND          |       |        |            |      |      | [37]          |
|                  | Vietnam | Urban drainage                 | 58-328      | 103   | 119    |            |      |      | [37]          |
|                  | Vietnam | Mekong River                   | 15-28       | 19    | 20.3   |            |      |      | [37]          |
|                  | USA     | Cache La Poudre River          | 20          |       | 20     | 1-13.7     |      | 4.7  | [21]          |
|                  | USA     | 139 stream sites               | Up to 220   |       |        |            |      |      | [20]          |
|                  | France  | Seine River                    | <10         |       |        |            |      |      | [47]          |
|                  | Germany | River waters and drainages     | ND          | ND    |        |            |      |      | [48]          |
| Sulfamethiazole  | China   | Coastal environment of Dalian  | ND-1.34     | ND    | 0.38   | ND         |      |      | [15]          |
| Sulfamethoxazole | China   | Lake Taihu                     | 2.29-234    | 25.8  |        | ND-0.46    | ND   |      | In this study |
|                  | China   | Lake Taihu                     | ND-114.7    |       | 48.4   | ND-49.3    |      | 16.1 | [17]          |



|       |                                              |            |       |       |          |    |      |  |      |
|-------|----------------------------------------------|------------|-------|-------|----------|----|------|--|------|
| China | Lake Chaohu                                  | ND-171.6   |       |       |          |    |      |  | [18] |
| China | Inflowing rivers of Lake Chaohu              | 2.5-95.6   |       |       |          |    |      |  | [18] |
| China | Baiyangdian Lake                             | ND-940     | 121   | 240   | ND-7.86  | ND | 0.28 |  | [22] |
| China | Bosten Lake                                  | 1.12-13.28 | 5.91  |       | ND       |    |      |  | [14] |
| China | Huangpu River                                | 4.9-55.2   |       |       |          |    |      |  | [19] |
| China | Huangpu River                                | 2.2-764.9  |       | 259.6 | 0.05-0.6 |    | 0.2  |  | [23] |
| China | Yangze Estuary                               | 0.3-56.8   |       |       |          |    |      |  | [24] |
| China | The Yangtze Estuary and nearby coastal areas |            |       |       | ND-1.13  |    |      |  | [25] |
| China | Pearl River                                  | ND-193     |       |       |          |    |      |  | [26] |
| China | Pearl River                                  | ND-616     |       |       |          |    |      |  | [27] |
| China | Pearl River                                  |            |       |       | ND-<LOQ  | ND |      |  | [29] |
| China | lower reach of the Pearl River               | Up to 37.6 |       |       | ND       |    |      |  | [28] |
| China | Victoria Harbour                             | ND         |       |       |          |    |      |  | [26] |
| China | Yellow River                                 | <LOQ-56    |       |       |          |    |      |  | [49] |
| China | Hai River                                    | 22.1-201   | 137   | 113.8 | ND       |    |      |  | [31] |
| China | Yellow River                                 |            |       |       | ND       |    |      |  | [34] |
| China | Hai River                                    |            |       |       | ND       |    |      |  | [34] |
| China | Liao River                                   |            |       |       | ND-<LOQ  | ND |      |  | [34] |
| China | Coastal environment of Dalian                | ND-2.23    | 1.41  | 1.28  | ND       |    |      |  | [15] |
| China | Liao River Basin                             | ND-1483.9  | 59.75 | 104.9 | ND-2.63  | ND | ND   |  | [16] |
| China | Laizhou Bay                                  | 1.5-82     | 13    | 19    |          |    |      |  | [32] |
| China | Jiulongjiang River                           | 0.05-58.3  | 10.73 | 15.98 |          |    |      |  | [33] |
| China | Streams in Jiangnan Plain                    | ND-13.4    |       |       |          |    |      |  | [30] |
| China | Streams with livestock farms                 | 3.58-11.9  |       |       | ND       |    |      |  | [35] |
| Japan | Nationwide survey                            | ND-33.9    | 1.1   | 4.85  |          |    |      |  | [36] |

|                         |           |                               |            |      |      |          |     |      |               |
|-------------------------|-----------|-------------------------------|------------|------|------|----------|-----|------|---------------|
|                         | Japan     | Tamagawa River                | 4-23       | 18.5 | 7    |          |     |      | [37]          |
|                         | Vietnam   | Urban drainage                | 37-360     | 153  | 179  |          |     |      | [37]          |
|                         | Vietnam   | Mekong River                  | 20-33      | 22   | 26.3 |          |     |      | [37]          |
|                         | USA       | Cache La Poudre River         | 40-320     |      | 110  | 1.2-1.9  | 1.6 |      | [21]          |
|                         | USA       | 139 stream sites              | Up to 1900 |      |      |          |     |      | [20]          |
|                         | UK        | Downstream of WWTPs           | <50        |      |      |          |     |      | [50]          |
|                         | France    | Arc River                     | ND         |      |      |          |     |      | [51]          |
|                         | France    | Seine River                   | Up to 121  |      |      |          |     |      | [38]          |
|                         | Germany   | Watersides in westphalia      | 40-200     |      |      |          |     |      | [52]          |
|                         | Germany   | River waters and drainages    | ND-480     | 30   |      |          |     |      | [39]          |
|                         | Spain     | Llobregat River               | 0.2-1500   |      |      |          |     |      | [53]          |
|                         | Spain     | Llobregat River               | 30-11920   |      | 1110 |          |     |      | [54]          |
|                         | Sweden    | Hoje River                    | ND-10      |      |      |          |     |      | [55]          |
|                         | Italian   | River Po                      | 1.83-2.39  |      | 2.1  |          |     |      | [56]          |
|                         | Italian   | River Arno                    | 1.79-11.4  |      | 5.3  |          |     |      | [47]          |
|                         | Australia | Six river systems             | ND-2000    | 8    |      |          |     |      | [57]          |
| Sulfamethoxy pyridazine | China     | Coastal environment of Dalian | ND-1.95    | ND   | 0.23 | ND-7.67  | ND  | 1.49 | [15]          |
|                         | China     | Liao River Basin              | ND-8.04    | ND   | 0.56 | ND       |     |      | [16]          |
| Sulfameter              | China     | Coastal environment of Dalian | ND-1.92    | ND   | 0.10 | ND-56.65 | ND  | 8.82 | [15]          |
| Sulfamonomethoxine      | China     | Lake Taihu                    | ND-85.8    | 5.58 |      | ND-0.49  | ND  |      | In this study |
|                         | China     | Baiyangdian Lake              | ND-23.1    | 5.40 | 6.92 | ND-0.50  | ND  | 0.06 | [22]          |
|                         | China     | Hai River                     | 2.3-19.4   | 8.9  | 10.8 | ND-0.9   | ND  | 0.1  | [31]          |
|                         | China     | Coastal environment of Dalian | ND-2.28    | ND   | 0.39 | ND-7.00  | ND  | 1.63 | [15]          |
| Sulfapyridine           | China     | Lake Taihu                    | ND-1.13    | ND   |      | ND-0.17  | ND  |      | In this study |
|                         | China     | Baiyangdian Lake              | ND-85.0    | 2.58 | 13.0 | ND-1.40  | ND  | 0.16 | [22]          |
|                         | China     | Huangpu River                 | 1.14-57.4  |      |      |          |     |      | [19]          |

|                  |         |                                              |           |      |      |            |      |      |               |
|------------------|---------|----------------------------------------------|-----------|------|------|------------|------|------|---------------|
|                  | China   | Huangpu River                                | ND-103.1  |      | 24.1 | ND-6.6     |      | 1.7  | [23]          |
|                  | China   | The Yangtze Estuary and nearby coastal areas |           |      |      | <MQL-9.12  |      |      | [25]          |
|                  | China   | Pearl River                                  |           |      |      | ND-<LOQ    |      |      | [29]          |
|                  | China   | Pearl River                                  | ND-74.6   |      |      |            |      |      | [27]          |
|                  | China   | Hai River                                    | ND-5.5    | 1.3  | 2.2  | ND-2.0     | ND   | 0.5  | [31]          |
|                  | China   | Yellow River                                 |           |      |      | ND         |      |      | [34]          |
|                  | China   | Hai River                                    |           |      |      | ND         |      |      | [34]          |
|                  | China   | Liao River                                   |           |      |      | ND         |      |      | [34]          |
|                  | China   | Liao River Basin                             | ND-0.96   | ND   | ND   | ND-0.68    | ND   | ND   | [16]          |
|                  | Japan   | Nationwide survey                            | ND-144    | 1.95 | 15.2 |            |      |      | [36]          |
|                  | Japan   | Tamagawa River                               | 21-132    | 108  | 41.9 |            |      |      | [37]          |
|                  | Vietnam | Urban drainage                               | ND        |      |      |            |      |      | [37]          |
|                  | Vietnam | Mekong River                                 | ND        |      |      |            |      |      | [37]          |
| Sulfaquinoxaline | China   | Lake Taihu                                   | ND        |      |      | ND-<MQL    | ND   |      | In this study |
|                  | China   | Yangze Estuary                               | ND-23.5   |      |      |            |      |      | [24]          |
|                  | China   | Huangpu River                                | ND-64.2   |      | 21.5 | 0.08-0.9   |      | 0.4  | [23]          |
|                  | China   | The Yangtze Estuary and nearby coastal areas |           |      |      | <MQL-0.959 |      |      | [25]          |
|                  | China   | Liao River Basin                             | ND-14.59  | ND   | 0.91 | ND         |      |      | [16]          |
| Sulfathiazole    | China   | Lake Taihu                                   | ND-8.18   | ND   |      | ND         |      |      | In this study |
|                  | China   | Lake Taihu                                   | ND-134.5  |      | 45.9 | ND-51.7    |      | 17.8 | [17]          |
|                  | China   | Baiyangdian Lake                             | ND-1.38   | ND   | 0.08 | ND-5.94    | 0.57 | 0.64 | [22]          |
|                  | China   | Huangpu River                                | ND-121.1  |      | 34.1 | ND-0.6     |      | 0.2  | [23]          |
|                  | China   | Yangze Estuary                               | 0.03-5.23 |      |      |            |      |      | [24]          |
|                  | China   | The Yangtze Estuary and nearby coastal areas |           |      |      | ND-<MQL    |      |      | [25]          |

|                           |           |                               |            |      |      |         |      |      |               |
|---------------------------|-----------|-------------------------------|------------|------|------|---------|------|------|---------------|
|                           |           | coastal areas                 |            |      |      |         |      |      |               |
|                           | China     | Streams in Jiangnan Plain     | ND-3.7     |      |      |         |      |      | [30]          |
|                           | China     | Coastal environment of Dalian | ND-1.24    | ND   | 0.34 | ND-1.89 | ND   | 0.09 | [15]          |
|                           | China     | Liao River Basin              | ND-7.5     | ND   | 0.8  | ND      |      |      | [16]          |
|                           | Japan     | Nationwide survey             | ND-0.02    | ND   | ND05 |         |      |      | [36]          |
|                           | Japan     | Tamagawa River                | ND         |      |      |         |      |      | [37]          |
|                           | Vietnam   | Urban drainage                | ND         |      |      |         |      |      | [37]          |
|                           | Vietnam   | Mekong River                  | ND         |      |      |         |      |      | [37]          |
|                           | USA       | 139 stream sites              | Up to 130  |      |      |         |      |      | [20]          |
|                           | USA       | Cache La Poudre River         | 10-30      |      | 10   | 1.3-5.4 |      | 3.3  | [21]          |
|                           | Australia | Six river systems             | ND-40      | ND   |      |         |      |      | [48]          |
| Sulfisoxazole             | China     | Lake Taihu                    | ND         |      |      | ND      |      |      | In this study |
|                           | China     | Lake Taihu                    | ND-61.4    |      | 44.4 | ND-22.6 |      | 11.0 | [17]          |
|                           | China     | Bosten Lake                   | 3.34-10.36 | 5.39 |      | ND-<MQL | <MQL |      | [14]          |
|                           | China     | Coastal environment of Dalian | ND-2.01    | ND   | 0.23 | ND      |      |      | [15]          |
| <b>Diaminopyrimidines</b> |           |                               |            |      |      |         |      |      |               |
| Trimethoprim              | China     | Lake Taihu                    | ND-18.3    | 1.28 |      | ND-1.09 | ND   |      | In this study |
|                           | China     | Lake Taihu                    | ND-40.8    |      | 12.0 | ND-39.3 |      | 9.3  | [17]          |
|                           | China     | Pearl River                   | ND-605     |      |      |         |      |      | [27]          |
|                           | China     | Yellow River                  |            |      |      | ND-<LOQ | ND   |      | [34]          |
|                           | China     | Hai River                     |            |      |      | ND-5.63 | ND   |      | [34]          |
|                           | China     | Liao River                    |            |      |      | ND-9.84 | 0.93 |      | [34]          |
|                           | China     | Laizhou Bay                   | 1.3-330    | 18   | 53   |         |      |      | [32]          |
|                           | China     | Streams in Jiangnan Plain     | ND-19.0    |      |      |         |      |      | [30]          |
|                           | China     | Streams with livestock farms  | 6.22-19.2  |      |      | ND-1.77 |      |      | [35]          |
|                           | Japan     | Nationwide survey             | ND-36      | 0.02 | 2.50 |         |      |      | [36]          |

|                      |           |                                              |             |      |       |            |       |               |
|----------------------|-----------|----------------------------------------------|-------------|------|-------|------------|-------|---------------|
|                      | Japan     | Tamagawa River                               | 19-54       | 29.5 | 13.7  |            |       | [37]          |
|                      | Vietnam   | Urban drainage                               | 15-46       | 28   | 29.9  |            |       | [37]          |
|                      | Vietnam   | Mekong River                                 | 7-19        | 17.5 | 15.3  |            |       | [37]          |
|                      | USA       | 139 stream sites                             | Up to 710   |      |       |            |       | [20]          |
|                      | Spain     | Llobregat River                              | ND-35.6     |      |       |            |       | [44]          |
|                      | Spain     | Llobregat River                              | 20-470      |      | 140   |            |       | [45]          |
|                      | UK        | Downstream of WWTPs                          | <10-42      | <10  | 12    |            |       | [41]          |
|                      | UK        | Estuaries                                    | <4-569      | <4   |       |            |       | [58]          |
|                      | France    | Seine River                                  | ND-45       |      |       |            |       | [38]          |
|                      | Sweden    | Hoje River                                   | <1-20       |      |       |            |       | [46]          |
|                      | Germany   | River waters and drainages                   | ND-200      | ND   |       |            |       | [39]          |
|                      | Germany   | Watersides in westphalia                     | 6-70 ng/L   |      |       |            |       | [43]          |
|                      | Australia | Six river systems                            | ND-150      | 3    |       |            |       | [48]          |
| <b>Tetracyclines</b> |           |                                              |             |      |       |            |       |               |
| Chlortetracycline    | China     | Lake Taihu                                   | ND-73.0     | ND   |       | ND-8.75    | ND    | In this study |
|                      | China     | Lake Taihu                                   | ND-142.5    |      | 67.9  | ND-48.5    | 19.0  | [17]          |
|                      | China     | Lake Chaohu                                  | ND-4.0      |      |       |            |       | [18]          |
|                      | China     | Inflowing rivers of Lake Chaohu              | ND-4.2      |      |       |            |       | [18]          |
|                      | China     | Bosten Lake                                  | ND-3.11     | 1.03 |       | 4.62-17.28 | 10.41 | [14]          |
|                      | China     | Huangpu River                                | ND-16.8     |      |       |            |       | [19]          |
|                      | China     | Huangpu River                                | ND-46.7     |      | 3.6   | ND-6.3     | 2.4   | [23]          |
|                      | China     | Yangze Estuary                               | ND-3.5      |      |       |            |       | [24]          |
|                      | China     | The Yangtze Estuary and nearby coastal areas |             |      |       | <MQL-12    |       | [25]          |
|                      | China     | Jiulongjiang River                           | 2.81-766.51 | 9.98 | 97.52 |            |       | [33]          |
|                      | China     | Streams in Jiangnan Plain                    | ND-122.3    |      |       |            |       | [30]          |

|             |           |                                              |           |      |      |           |      |      |               |
|-------------|-----------|----------------------------------------------|-----------|------|------|-----------|------|------|---------------|
|             | China     | Yellow River                                 |           |      |      | ND        |      |      | [34]          |
|             | China     | Hai River                                    |           |      |      | ND-10.9   | ND   |      | [34]          |
|             | China     | Liao River                                   |           |      |      | ND-32.5   | ND   |      | [34]          |
|             | China     | Coastal environment of Dalian                | 1.01-3.00 | 1.23 | 1.49 | ND        |      |      | [15]          |
|             | China     | Streams with livestock farms                 | ND-98.2   |      |      | 315-1010  |      |      | [35]          |
|             | USA       | 139 stream sites                             | Up to 690 |      |      |           |      |      | [20]          |
|             | USA       | Cache La Poudre River                        | 10-210    |      | 80   | 1.1- 30.8 |      | 10.8 | [21]          |
|             | Germany   | River waters and drainages                   | ND        | ND   |      |           |      |      | [39]          |
|             | Australia | Six river systems                            | ND-600    | 3    |      |           |      |      | [48]          |
| Doxycycline | China     | Lake Taihu                                   | ND-947    | ND   |      | ND-6.09   | <MQL |      | In this study |
|             | China     | Lake Chaohu                                  | ND-42.3   |      |      |           |      |      | [18]          |
|             | China     | Inflowing rivers of Lake Chaohu              | ND-3.5    |      |      |           |      |      | [18]          |
|             | China     | Bosten Lake                                  | ND-4.92   | 2.06 |      | <MQL-9.96 | 4.23 |      | [14]          |
|             | China     | Huangpu River                                | ND-46.9   |      |      |           |      |      | [19]          |
|             | China     | Huangpu River                                | ND-112.3  |      | 11.3 | ND-6.3    |      | 2.4  | [23]          |
|             | China     | Yangze Estuary                               | ND-5.6    |      |      |           |      |      | [24]          |
|             | China     | The Yangtze Estuary and nearby coastal areas |           |      |      | <MQL-18.6 |      |      | [25]          |
|             | China     | Coastal environment of Dalian                | ND-1.56   | ND   | 0.26 | 1.10-1.54 | 1.44 | 1.33 | [15]          |
|             | China     | Liao River Basin                             | ND-25.05  | ND   | 1.38 | ND-12.26  | ND   | 2.00 | [16]          |
|             | China     | Streams with livestock farms                 | ND-12.6   |      |      | 35.8-444  |      |      | [35]          |
|             | China     | Streams in Jiangnan Plain                    | ND-66.5   |      |      |           |      |      | [30]          |
|             | China     | Yellow River                                 |           |      |      | ND        |      |      | [34]          |
|             | China     | Hai River                                    |           |      |      | ND-7.0    | ND   |      | [34]          |
|             | China     | Liao River                                   |           |      |      | ND-2.8    | ND   |      | [34]          |
|             | USA       | Cache La Poudre River                        | 10-50     |      | 30   | 2.2-38.9  |      | 15.7 | [21]          |

|                 |                       |                                              |             |       |          |            |      |       |               |
|-----------------|-----------------------|----------------------------------------------|-------------|-------|----------|------------|------|-------|---------------|
| Oxytetracycline | USA                   | 139 stream sites                             | ND          |       |          |            |      |       | [20]          |
|                 | Germany               | River waters and drainages                   | ND          | ND    |          |            |      |       | [39]          |
|                 | Australia             | Six river systems                            | ND-400      | ND    |          |            |      |       | [48]          |
|                 | China                 | Lake Taihu                                   | ND-34.8     | ND    |          | ND-9.00    | ND   |       | In this study |
|                 | China                 | Lake Taihu                                   | ND-72.8     |       | 44.2     | ND-196.7   |      | 52.8  | [17]          |
|                 | China                 | Baiyangdian Lake                             | 4.64-90.3   |       | 27.17    | 4.28-35.4  |      | 15.66 | [59]          |
|                 | China                 | Lake Chaohu                                  | ND-2.9      |       |          |            |      |       | [18]          |
|                 | China                 | Inflowing rivers of Lake Chaohu              | ND-16.5     |       |          |            |      |       | [18]          |
|                 | China                 | Bosten Lake                                  | ND-6.6      | 2.99  |          | 4.61-20.67 | 7.79 |       | [14]          |
|                 | China                 | Huangpu River                                | 11.5-84.5   |       |          |            |      |       | [19]          |
|                 | China                 | Huangpu River                                | ND-219.8    |       | 78.3     | 0.6-18.6   |      | 6.9   | [23]          |
|                 | China                 | Yangze Estuary                               | ND-22.5     |       |          |            |      |       | [24]          |
|                 | China                 | The Yangtze Estuary and nearby coastal areas |             |       |          | 0.305-14   |      |       | [25]          |
|                 | China                 | Pearl River                                  |             |       |          | ND- 196    | 7.15 |       | [29]          |
|                 | China                 | Yellow River                                 |             |       |          | ND-184     | ND   |       | [34]          |
|                 | China                 | Hai River                                    |             |       |          | ND-422     | 2.52 |       | [34]          |
|                 | China                 | Liao River                                   |             |       |          | ND- 652    | 2.34 |       | [34]          |
|                 | China                 | Jiulongjiang River                           | 2.75-456.67 | 36.91 | 117.97   |            |      |       | [33]          |
|                 | China                 | Coastal environment of Dalian                | 1.09-6.28   | 2.08  | 2.46     | ND         |      |       | [15]          |
|                 | China                 | Liao River Basin                             | ND-741.85   | ND    | 22.41    | ND-384.59  | 3.71 | 29.21 | [16]          |
|                 | China                 | Streams in Jiangnan Plain                    | ND-61.8     |       |          |            |      |       | [30]          |
|                 | China                 | Streams with livestock farms                 | 33-60       |       |          | 497-214    |      |       | [35]          |
|                 | Japan                 | Streams with livestock farms                 | 2-6800      |       |          |            |      |       | [60]          |
| USA             | Cache La Poudre River | 10-1210                                      |             | 180   | 2.4-56.1 |            | 14.8 | [21]  |               |
| USA             | 139 stream sites      | Up to 340                                    |             |       |          |            |      | [20]  |               |

|              |           |                                              |            |       |       |            |      |       |               |
|--------------|-----------|----------------------------------------------|------------|-------|-------|------------|------|-------|---------------|
|              | France    | Arc River                                    | ND-650     |       |       |            |      |       | [42]          |
|              | Germany   | River waters and drainages                   | ND         | ND    |       |            |      |       | [39]          |
|              | Italian   | River Po                                     | <1.19-1.82 |       | 1.1   |            |      |       | [47]          |
|              | Italian   | River Arno                                   | <1.19      |       | <1.19 |            |      |       | [47]          |
|              | Australia | Six river systems                            | ND-100     | ND    |       |            |      |       | [48]          |
| Tetracycline | China     | Lake Taihu                                   | ND-4.18    | ND    |       | ND-27.0    | ND   |       | In this study |
|              | China     | Lake Taihu                                   | ND-87.9    |       | 43.2  | ND-112.2   |      | 47.9  | [17]          |
|              | China     | Baiyangdian Lake                             | 8.07-85.19 |       | 25.95 | 4.78-93.36 |      | 25.71 | [50]          |
|              | China     | Lake Chaohu                                  | ND-17.8    |       |       |            |      |       | [18]          |
|              | China     | Inflowing rivers of Lake Chaohu              | ND-1.9     |       |       |            |      |       | [18]          |
|              | China     | Bosten Lake                                  | ND-4.92    | 2.06  |       | <MQL-9.96  | 4.23 |       | [14]          |
|              | China     | Huangpu River                                | ND-113.9   |       |       |            |      |       | [19]          |
|              | China     | Huangpu River                                | ND-54.3    |       | 4.2   | ND-21.7    |      | 3.5   | [23]          |
|              | China     | Yangze Estuary                               | ND-2.4     |       |       |            |      |       | [24]          |
|              | China     | The Yangtze Estuary and nearby coastal areas |            |       |       | <MQL-6.84  |      |       | [25]          |
|              | China     | Pearl River                                  |            |       |       | ND- 72.6   | 4.05 |       | [29]          |
|              | China     | lower reach of the Pearl River               | Up to 13.1 |       |       | Up to 7.13 |      |       | [28]          |
|              | China     | Yellow River                                 |            |       |       | ND- 18     | ND   |       | [34]          |
|              | China     | Hai River                                    |            |       |       | 1.06- 135  | 2.0  |       | [34]          |
|              | China     | Liao River                                   |            |       |       | ND-4.82    | ND   |       | [34]          |
|              | China     | Coastal environment of Dalian                | 1.01-3.00  | 1.23  | 1.49  | ND         |      |       | [15]          |
|              | China     | Liao River Basin                             | ND-28.65   | ND    | ND    | ND-7.97    | ND   | 0.98  | [16]          |
|              | China     | Jiulongjiang River                           | 3.28-49.57 | 10.48 | 13.87 |            |      |       | [33]          |
|              | China     | Streams in Jiangnan Plain                    | ND-137.4   |       |       |            |      |       | [30]          |
|              | China     | Streams with livestock farms                 | ND-8.73    |       |       | 13.7-56.3  |      |       | [35]          |



|                         |           |                                              |             |       |      |            |       |      |               |
|-------------------------|-----------|----------------------------------------------|-------------|-------|------|------------|-------|------|---------------|
|                         | USA       | Cache La Poudre River                        | 10-30       |       | 20   | 1.1- 102.7 | 17.9  |      | [21]          |
|                         | USA       | 139 stream sites                             | Up to 110   |       |      |            |       |      | [20]          |
|                         | Germany   | River waters and drainages                   | ND          | ND    |      |            |       |      | [39]          |
|                         | Australia | Six river systems                            | ND-80       | ND    |      |            |       |      | [48]          |
| <b>Fluoroquinolones</b> |           |                                              |             |       |      |            |       |      |               |
| Ciprofloxacin           | China     | Lake Taihu                                   | ND          |       |      | ND-46.5    | 3.76  |      | In this study |
|                         | China     | Lake Taihu                                   | ND-43.6     |       | 8.8  | ND-25.3    |       | 9.8  | [17]          |
|                         | China     | Lake Chaohu                                  | ND-23.2     |       |      |            |       |      | [18]          |
|                         | China     | Inflowing rivers of Lake Chaohu              | ND-21.0     |       |      |            |       |      | [18]          |
|                         | China     | Baiyangdian Lake                             | ND-60.3     | 4.55  | 9.45 | ND-46.0    | ND    | 2.49 | [22]          |
|                         | China     | Bosten Lake                                  | 17.33-112.3 | 39.22 |      | 21.18-213  | 76.51 |      | [14]          |
|                         | China     | Huangpu River                                | <MQL        |       |      |            |       |      | [19]          |
|                         | China     | Huangpu River                                | ND-34.2     |       | 2.7  | ND         |       |      | [23]          |
|                         | China     | Yangze Estuary                               | ND-2.3      |       |      |            |       |      | [24]          |
|                         | China     | The Yangtze Estuary and nearby coastal areas |             |       |      | <MQL-42.9  |       |      | [25]          |
|                         | China     | Pearl River                                  |             |       |      | ND-197     | 21.8  |      | [29]          |
|                         | China     | Hai River                                    | ND-19.7     | 13.4  | 11.3 | ND-88.3    | 13.8  | 23.2 | [31]          |
|                         | China     | Yellow River                                 |             |       |      | ND-32.8    | ND    |      | [34]          |
|                         | China     | Hai River                                    |             |       |      | 2.05- 1290 | 16.0  |      | [34]          |
|                         | China     | Liao River                                   |             |       |      | ND-28.7    | ND    |      | [34]          |
|                         | China     | Liao River Basin                             | ND-185.14   | ND    | 11.6 | ND-13.15   | ND    | ND   | [16]          |
|                         | China     | Laizhou Bay                                  | ND-66       | 25    | 31   |            |       |      | [32]          |
|                         | China     | Streams in Jiangnan Plain                    | ND-18.0     |       |      |            |       |      | [30]          |
|                         | China     | Streams with livestock farms                 | ND-8.91     |       |      | 8.72-20.5  |       |      | [35]          |
|                         | USA       | 139 stream sites                             | Up to 30    |       |      |            |       |      |               |

|              |           |                                              |            |      |      |            |      |      |               |
|--------------|-----------|----------------------------------------------|------------|------|------|------------|------|------|---------------|
|              | France    | Arc River                                    | ND-9660    |      |      |            |      |      | [42]          |
|              | Germany   | Watersides in westphalia                     | Up to 13   |      |      |            |      |      | [43]          |
|              | Italian   | River Po                                     | 1.32-16    |      | 8.8  |            |      |      | [47]          |
|              | Italian   | River Arno                                   | <1.8-37.5  |      | 19   |            |      |      | [47]          |
|              | Australia | Six river systems                            | ND-1300    | ND   |      |            |      |      | [48]          |
| Danofloxacin | China     | Lake Taihu                                   | ND-12.2    | ND   |      | ND-34.1    | ND   |      | In this study |
|              | China     | Jiulongjiang River                           | <2.17-3.95 | 3.32 | 3.43 |            |      |      | [33]          |
|              | France    | Seine River                                  | ND-19      |      |      |            |      |      | [38]          |
| Difloxacin   | China     | Lake Taihu                                   | ND-40.4    | ND   |      | ND-79.0    | 1.27 |      | In this study |
|              | China     | Lake Chaohu                                  | ND-10.4    |      |      |            |      |      | [18]          |
|              | China     | Inflowing rivers of Lake Chaohu              | <MQL-12.4  |      |      |            |      |      | [18]          |
|              | China     | Baiyangdian Lake                             | ND         |      |      | ND         |      |      | [22]          |
|              | China     | Hai River                                    | ND-3.4     | ND   | 0.5  | ND-16.9    | 2.3  | 5.0  | [31]          |
|              | France    | Seine River                                  | <10        |      |      |            |      |      | [38]          |
| Enrofloxacin | China     | Lake Taihu                                   | ND-7.57    | ND   |      | ND-54.2    | <MQL |      | In this study |
|              | China     | Lake Chaohu                                  | ND-82.7    |      |      |            |      |      | [18]          |
|              | China     | Inflowing rivers of Lake Chaohu              | ND-20.7    |      |      |            |      |      | [18]          |
|              | China     | Baiyangdian Lake                             | ND-4.42    | 1.31 | 1.26 | ND-13.0    | ND   | 0.46 | [22]          |
|              | China     | Bosten Lake                                  | ND-15.22   | 6.03 |      | 3.42-19.96 | 8.6  |      | [14]          |
|              | China     | Huangpu River                                | <MQL       |      |      |            |      |      | [19]          |
|              | China     | Huangpu River                                | ND-14.6    |      | 2.8  | ND-8.9     |      | 3.2  | [23]          |
|              | China     | Yangze Estuary                               | ND-4.8     |      |      |            |      |      | [24]          |
|              | China     | The Yangtze Estuary and nearby coastal areas |            |      |      | <MQL-4.84  |      |      | [25]          |
|              | China     | lower reach of the Pearl River               | ND         |      |      | Up to 1.43 |      |      | [28]          |
|              | China     | Hai River                                    | ND-1.0     | ND   | 0.4  | ND-69.7    | 15.5 | 19.8 | [31]          |

|              |           |                                 |          |       |       |          |      |      |               |
|--------------|-----------|---------------------------------|----------|-------|-------|----------|------|------|---------------|
|              | China     | Yellow River                    |          |       |       | ND       |      |      | [34]          |
|              | China     | Hai River                       |          |       |       | ND-2.34  | ND   |      | [34]          |
|              | China     | Liao River                      |          |       |       | ND       |      |      | [34]          |
|              | China     | Liao River Basin                | ND-70.36 | 25.13 | 25.72 | ND-25.67 | ND   | 2.71 | [16]          |
|              | China     | Laizhou Bay                     | ND-7.6   | ND    | 1.8   |          |      |      | [32]          |
|              | China     | Streams in Jiangnan Plain       | ND-53.1  |       |       |          |      |      | [30]          |
|              | China     | Streams with livestock farms    | ND-2.45  |       |       | 21.3-137 |      |      | [35]          |
|              | France    | Seine River                     | <10      |       |       |          |      |      | [38]          |
|              | Australia | Six river systems               | ND-300   | ND    |       |          |      |      | [48]          |
| Fleroxacin   | China     | Lake Taihu                      | ND-30.3  | ND    |       | ND-13.2  | ND   |      | In this study |
|              | China     | Baiyangdian Lake                | ND-6.35  | 2.05  | 2.29  | ND-6.69  | ND   | 0.15 | [22]          |
|              | China     | Hai River                       | ND-7.3   | 1.3   | 2.2   | ND-24.2  | ND   | 5.3  | [31]          |
|              | China     | Streams with livestock farms    | ND-4.48  |       |       | ND       |      |      | [35]          |
| Lomefloxacin | China     | Lake Taihu                      | ND-16.3  | ND    |       | ND-11.1  | ND   |      | In this study |
|              | China     | Lake Chaohu                     | ND-5.50  |       |       |          |      |      | [18]          |
|              | China     | Inflowing rivers of Lake Chaohu | ND-24.0  |       |       |          |      |      | [18]          |
|              | China     | Baiyangdian Lake                | ND       |       |       | ND-29.0  | ND   | 0.98 | [22]          |
|              | China     | Hai River                       | ND-0.9   | ND    | 0.1   | ND-16.2  | 3.8  | 4.8  | [31]          |
|              | China     | Yellow River                    |          |       |       | ND       |      |      | [34]          |
|              | China     | Hai River                       |          |       |       | ND-298   | 1.67 |      | [34]          |
|              | China     | Liao River                      |          |       |       | ND-5.82  | ND   |      | [34]          |
|              | China     | Streams in Jiangnan Plain       | ND-13.1  |       |       |          |      |      | [30]          |
|              | China     | Streams with livestock farms    | ND       |       |       | ND-2.78  |      |      | [35]          |
|              | France    | Seine River                     | <10      |       |       |          |      |      | [38]          |
|              | Italian   | River Po                        | <0.31    |       | <0.31 |          |      |      | [47]          |
|              | Italian   | River Arno                      | <0.31    |       | <0.31 |          |      |      | [47]          |

|               |                           |                                              |            |      |       |            |      |      |               |
|---------------|---------------------------|----------------------------------------------|------------|------|-------|------------|------|------|---------------|
| Marbofloxacin | China                     | Lake Taihu                                   | ND-16.7    | ND   |       | ND-8.93    | ND   |      | In this study |
|               | China                     | Streams with livestock farms                 | ND-3.46    |      |       | ND         |      |      | [35]          |
| Norfloxacin   | China                     | Lake Taihu                                   | ND-<MQL    |      |       | ND-12.2    | ND   |      | In this study |
|               | China                     | Lake Taihu                                   | ND-6.5     | 4.3  |       | ND-28.4    |      | 9.9  | [17]          |
|               | China                     | Lake Chaohu                                  | ND-70.2    |      |       |            |      |      | [18]          |
|               | China                     | Inflowing rivers of Lake Chaohu              | ND-107.4   |      |       |            |      |      | [18]          |
|               | China                     | Baiyangdian Lake                             | ND-156     | 19.6 | 28.6  | 49.4-1140  | 255  | 267  | [22]          |
|               | China                     | Baiyangdian Lake                             | 3.00-97.00 |      | 31.6  | 104-550    |      | 274  | [50]          |
|               | China                     | Huangpu River                                | ND-0.2     |      |       | ND         |      |      | [23]          |
|               | China                     | Yangze Estuary                               | ND-14.2    |      |       |            |      |      | [24]          |
|               | China                     | The Yangtze Estuary and nearby coastal areas |            |      |       | <MQL-69.3  |      |      | [25]          |
|               | China                     | Pearl River                                  |            |      |       | ND-1120    | 88.0 |      | [29]          |
|               | China                     | Pearl River                                  | ND-174     |      |       |            |      |      | [27]          |
|               | China                     | Pearl River                                  | ND-251     |      |       |            |      |      | [26]          |
|               | China                     | lower reach of the Pearl River               | Up to 136  |      |       | Up to 20.5 |      |      | [28]          |
|               | China                     | Victoria Harbour                             | ND-28.1    |      |       |            |      |      | [26]          |
|               | China                     | Yellow River                                 | <LOQ-300   |      |       |            |      |      | [40]          |
|               | China                     | Hai River                                    | ND-129     | 58.5 | 65.5  | 3.9-141    | 56.6 | 67.2 | [31]          |
|               | China                     | Liao River Basin                             | ND-256.03  | ND   | 49.03 | ND-52.48   | 7.14 | 11.7 | [16]          |
|               | China                     | Yellow River                                 |            |      |       | ND-114     | 8.34 |      | [34]          |
|               | China                     | Hai River                                    |            |      |       | ND-5770    | 32.0 |      | [34]          |
|               | China                     | Liao River                                   |            |      |       | ND-176     | 3.32 |      | [34]          |
| China         | Laizhou Bay               | 7.5-103                                      | 38         | 40   |       |            |      | [32] |               |
| China         | Streams in Jiangnan Plain | ND-134.2                                     |            |      |       |            |      | [30] |               |
| China         | Jiulongjiang River        | <1.13-6.70                                   | 3.75       | 3.57 |       |            |      | [33] |               |

|           |                  |                                              |            |       |          |             |       |       |               |
|-----------|------------------|----------------------------------------------|------------|-------|----------|-------------|-------|-------|---------------|
| Ofloxacin | China            | Streams with livestock farms                 | ND-14.8    |       |          | 19.9-27.6   |       |       | [35]          |
|           | USA              | 139 stream sites                             | Up to 120  |       |          |             |       |       | [20]          |
|           | France           | Seine River                                  | ND-163     |       |          |             |       |       | [38]          |
|           | Australia        | Six river systems                            | ND-1150    | 30    |          |             |       |       | [48]          |
|           | China            | Lake Taihu                                   | ND-26.3    | ND    |          | ND-12.2     | ND    |       | In this study |
|           | China            | Lake Taihu                                   | ND-82.8    |       | 32.2     | ND-52.8     |       | 16.5  | [17]          |
|           | China            | Lake Chaohu                                  | ND-182.7   |       |          |             |       |       | [18]          |
|           | China            | Inflowing rivers of Lake Chaohu              | 1.5-383.4  |       |          |             |       |       | [18]          |
|           | China            | Baiyangdian Lake                             | 2.02-9.43  |       | 4.33     | 18.62-71.51 |       | 39.73 | [50]          |
|           | China            | Bosten Lake                                  | 1.3-32.24  | 9.29  |          | 18.39-94.1  | 40.99 |       | [14]          |
|           | China            | Huangpu River                                | <MQL       |       |          |             |       |       | [19]          |
|           | China            | Huangpu River                                | ND-28.5    |       | 6.5      | ND-12.4     |       | 4.1   | [23]          |
|           | China            | Yangze Estuary                               | ND-12.4    |       |          |             |       |       | [24]          |
|           | China            | The Yangtze Estuary and nearby coastal areas |            |       |          | <MQL-458.2  |       |       | [25]          |
|           | China            | Pearl River                                  | ND-108     |       |          |             |       |       | [26]          |
|           | China            | Pearl River                                  |            |       |          | ND- 1560    | 156   |       | [29]          |
|           | China            | lower reach of the Pearl River               | Up to 15.8 |       |          | Up to 13.7  |       |       | [28]          |
|           | China            | Victoria Harbour                             | ND-16.4    |       |          |             |       |       | [26]          |
|           | China            | Yellow River                                 | <LOQ-264   |       |          |             |       |       | [40]          |
|           | China            | Hai River                                    | 9.1-95.2   | 30.9  | 36.4     | ND-64.6     | 33.4  | 36.8  | [31]          |
| China     | Yellow River     |                                              |            |       | ND-123   | 3.07        |       | [34]  |               |
| China     | Hai River        |                                              |            |       | ND-653   | 10.3        |       | [34]  |               |
| China     | Liao River       |                                              |            |       | ND-50.5  | 3.56        |       | [34]  |               |
| China     | Liao River Basin | ND-632.52                                    | ND         | 37.93 | ND-51.36 | ND          | 5.62  | [16]  |               |

|                   |         |                              |            |      |      |           |    |     |               |
|-------------------|---------|------------------------------|------------|------|------|-----------|----|-----|---------------|
|                   | China   | Laizhou Bay                  | ND-6.5     | ND   | 0.24 |           |    |     | [32]          |
|                   | China   | Streams in Jiangnan Plain    | ND-135.1   |      |      |           |    |     | [30]          |
|                   | China   | Streams with livestock farms | ND-14.5    |      |      | 17.7-235  |    |     | [35]          |
|                   | Spain   | Llobregat River              | <LOD-488.4 |      |      |           |    |     | [44]          |
|                   | Spain   | Llobregat River              | 190-8770   |      | 2110 |           |    |     | [45]          |
|                   | Italian | River Po                     | 0.65-18.06 |      | 10.9 |           |    |     | [47]          |
|                   | Italian | River Arno                   | <1.4-10.88 |      | 5    |           |    |     | [47]          |
|                   | France  | Seine River                  | ND-55      |      |      |           |    |     | [38]          |
| Pefloxacin        | China   | Lake Taihu                   | ND-323     | ND   |      | ND-9.12   | ND |     | In this study |
|                   | China   | Streams with livestock farms | ND         |      |      | 4.45-20.5 |    |     | [35]          |
| Sarafloxacin      | China   | Lake Taihu                   | ND-1.43    | ND   |      | ND-15.6   | ND |     | In this study |
|                   | China   | Baiyangdian Lake             | ND-28.2    | 11.0 | 9.30 | ND        |    |     | [22]          |
|                   | China   | Hai River                    | ND-11.9    | ND   | 4.4  | ND-35.9   | ND | 8.8 | [31]          |
|                   | China   | Jiulongjiang River           | <1.90-7.09 | 3.71 | 3.89 |           |    |     | [33]          |
|                   | USA     | 139 stream sites             | ND         |      |      |           |    |     | [20]          |
|                   | France  | Seine River                  | <10        |      |      |           |    |     | [38]          |
| Carbadox          | China   | Lake Taihu                   | ND         |      |      | ND        |    |     | In this study |
|                   | USA     | 139 stream sites             | ND         |      |      |           |    |     | [20]          |
| <b>Macrolides</b> |         |                              |            |      |      |           |    |     |               |
| Azithromycin      | China   | Lake Taihu                   | ND-8.11    | ND   |      | ND-<MQL   |    |     | In this study |
|                   | China   | Streams in Jiangnan Plain    | 0.3-5.6    |      |      |           |    |     | [30]          |
|                   | China   | Laizhou Bay                  | ND-1.20    | ND   | 0.14 |           |    |     | [32]          |
|                   | Japan   | Nationwide survey            | ND-44.5    | ND05 | 1.94 |           |    |     | [36]          |
|                   | Japan   | Tamagawa River               | 43-448     | 153  | 89.1 |           |    |     | [37]          |
|                   | Vietnam | Urban drainage               | ND         |      |      |           |    |     | [37]          |
|                   | Vietnam | Mekong River                 | ND         |      |      |           |    |     | [37]          |

|                               |           |                                              |                |      |      |           |      |      |               |
|-------------------------------|-----------|----------------------------------------------|----------------|------|------|-----------|------|------|---------------|
|                               | France    | Arc River                                    | ND             |      |      | ND-265    |      |      | [42]          |
|                               | Spain     | Llobregat River                              | <MDL           |      |      |           |      |      | [45]          |
| Clarithromycin                | China     | Lake Taihu                                   | ND             |      |      | ND        |      |      | In this study |
|                               | China     | Streams in Jiangnan Plain                    | 0.6-15.8       |      |      |           |      |      | [30]          |
|                               | Japan     | Nationwide survey                            | ND-233         | 1    | 16.1 |           |      |      | [36]          |
|                               | Japan     | Tamagawa River                               | 55-254         | 168  | 71.5 |           |      |      | [37]          |
|                               | Vietnam   | Urban drainage                               | ND             |      |      |           |      |      | [37]          |
|                               | Vietnam   | Mekong River                                 | ND             |      |      |           |      |      | [37]          |
|                               | France    | Arc River                                    | ND-1560        |      |      | ND-3.82   |      |      | [42]          |
|                               | Germany   | River waters and drainages                   | ND-260         | ND   |      |           |      |      | [39]          |
|                               | Italian   | River Po                                     | 0.89-2.19      |      | 1.7  |           |      |      | [47]          |
|                               | Italian   | River Arno                                   | 6.7-44.76      |      | 25.4 |           |      |      | [47]          |
| Erythromycin                  | China     | Baiyangdian Lake                             | ND-121         | 4.94 | 19.5 | ND-3.04   | 0.42 | 0.59 | [22]          |
|                               | China     | Huangpu River                                | 0.4-6.9        |      | 3.9  | 1.5-24.6  |      | 10.2 | [23]          |
|                               | China     | Yangze Estuary                               | 0.05-45.4      |      |      |           |      |      | [24]          |
|                               | China     | The Yangtze Estuary and nearby coastal areas |                |      |      | <MQL-51.5 |      |      | [25]          |
|                               | China     | Hai River                                    | 3.1-10.3       | 5.6  | 6.5  | ND-5.8    | ND   | 1.5  | [31]          |
|                               | China     | Laizhou Bay                                  | 0.9-8.5        | 2.4  | 2.6  |           |      |      | [32]          |
|                               | Japan     | Nationwide survey                            | ND-27.8        | 0.01 | 2.55 |           |      |      | [36]          |
|                               | Spain     | Llobregat River                              | ND-362.5       |      |      |           |      |      | [44]          |
|                               | Spain     | Llobregat River                              | 10-70          |      | 30   |           |      |      | [45]          |
|                               | Italian   | River Po                                     | 0.78-4.62      |      | 2.9  |           |      |      | [47]          |
|                               | Italian   | River Arno                                   | 2.88-8.12      |      | 5.4  |           |      |      | [47]          |
|                               | Australia | Six river systems                            | Not quantified |      |      |           |      |      | [48]          |
| Erythromycin-H <sub>2</sub> O | China     | Lake Taihu                                   | ND-4.66        | ND   |      | ND-<MQL   | ND   |      | In this study |

|               |           |                                |                |       |        |            |  |      |               |      |
|---------------|-----------|--------------------------------|----------------|-------|--------|------------|--|------|---------------|------|
|               | China     | Lake Taihu                     | ND-624.8       |       | 109.1  | ND-120.3   |  | 27.7 | [17]          |      |
|               | China     | Pearl River                    | ND-636         |       |        |            |  |      | [26]          |      |
|               | China     | Pearl River                    |                |       |        | ND-385     |  | 24.4 | [29]          |      |
|               | China     | Pearl River                    | ND-2070        |       |        |            |  |      | [27]          |      |
|               | China     | lower reach of the Pearl River | Up to 121      |       |        | Up to 14.0 |  |      | [28]          |      |
|               | China     | Victoria Harbour               | ND-5.2         |       |        |            |  |      | [26]          |      |
|               | China     | Yellow River                   | <LOQ-102       |       |        |            |  |      | [40]          |      |
|               | China     | Yellow River                   |                |       |        | ND-49.8    |  | 1.28 | [34]          |      |
|               | China     | Hai River                      |                |       |        | ND-67.7    |  | <LOQ | [34]          |      |
|               | China     | Liao River                     |                |       |        | ND- 40.3   |  | 3.61 | [34]          |      |
|               | China     | Liao River Basin               | ND-2834.36     | 50.07 | 165.41 | ND-175.38  |  | ND   | 11.45         | [16] |
|               | China     | Streams in Jiangnan Plain      | ND-381.5       |       |        |            |  |      | [30]          |      |
|               | Japan     | Nationwide survey              | ND-128         | 1.1   | 8.13   |            |  |      | [36]          |      |
|               | Japan     | Tamagawa River                 | 21-120         | 78    | 32.9   |            |  |      | [37]          |      |
|               | Vietnam   | Urban drainage                 | 29-41          | 35.6  | 36.5   |            |  |      | [37]          |      |
|               | Vietnam   | Mekong River                   | 9-12           | 10.5  | 10.5   |            |  |      | [37]          |      |
|               | USA       | 139 stream sites               | Up to 1700     |       |        |            |  |      | [20]          |      |
|               | USA       | Cache La Poudre River          | 20-450         |       | 120    | 1.3- 25.6  |  | 10   | [21]          |      |
|               | Germany   | Watersides in westphalia       | Up to 200      |       |        |            |  |      | [43]          |      |
|               | Germany   | River waters and drainages     | ND-1700        | 150   |        |            |  |      | [39]          |      |
|               | Italian   | River Po                       | 1.66-5.31      |       | 3.7    |            |  |      | [47]          |      |
|               | Italian   | River Arno                     | 9.68-30.52     |       | 17.9   |            |  |      | [47]          |      |
|               | Australia | Six river systems              | Not quantified |       |        |            |  |      | [48]          |      |
| Leucomycin    | China     | Lake Taihu                     | ND             |       |        | ND-<MQL    |  | ND   | In this study |      |
| Oleandomycin  | Australia | Six river systems              | ND-20          | ND    |        |            |  |      | [48]          |      |
| Roxithromycin | China     | Lake Taihu                     | ND-1.80        | ND    |        | ND-3.56    |  | ND   | In this study |      |



|         |                                              |           |      |       |            |      |       |      |
|---------|----------------------------------------------|-----------|------|-------|------------|------|-------|------|
| China   | Lake Taihu                                   | ND-218.3  |      | 50.7  | ND-45.2    |      | 16.9  | [17] |
| China   | Baiyangdian Lake                             | ND-155    | 2.64 | 27.2  | ND-302     | 36.4 | 64.9  | [22] |
| China   | Huangpu River                                | 0.13-9.93 |      |       |            |      |       | [19] |
| China   | Huangpu River                                | 0.2-2.2   |      | 0.9   | 0.3-4.1    |      | 1.9   | [23] |
| China   | Yangze Estuary                               | 0.05-8.20 |      |       |            |      |       | [24] |
| China   | The Yangtze Estuary and nearby coastal areas |           |      |       | <MQL-3.61  |      |       | [25] |
| China   | Pearl River                                  |           |      |       | ND-133     | 24.7 |       | [29] |
| China   | Pearl River                                  | ND-2260   |      |       |            |      |       | [27] |
| China   | Pearl River                                  | ND-169    |      |       |            |      |       | [26] |
| China   | lower reach of the Pearl River               | <MQL-1.5  | <MQL | 0.38  | Up to 13.5 |      |       | [28] |
| China   | Victoria Harbour                             | ND-30.6   |      |       |            |      |       | [26] |
| China   | Yellow River                                 | <LOQ-95   |      |       |            |      |       | [40] |
| China   | Hai River                                    | 1.5-24.3  | 10   | 10.5  | ND-40.2    | 5.9  | 10.4  | [31] |
| China   | Yellow River                                 |           |      |       | ND-6.8     | ND   |       | [34] |
| China   | Hai River                                    |           |      |       | ND- 11.7   | 2.29 |       | [34] |
| China   | Liao River                                   |           |      |       | ND-29.6    | 5.51 |       | [34] |
| China   | Liao River Basin                             | ND-740.99 | 6.75 | 36.47 | ND-229.31  | 3.10 | 21.31 | [16] |
| China   | Laizhou Bay                                  | ND-0.43   | ND   | 0.02  |            |      |       | [32] |
| China   | Streams in Jiangnan Plain                    | 0.6-9.8   |      |       |            |      |       | [30] |
| Japan   | Tamagawa River                               | 13-43     | 28   | 11.7  |            |      |       | [37] |
| Vietnam | Urban drainage                               | ND        |      |       |            |      |       | [37] |
| Vietnam | Mekong River                                 | ND        |      |       |            |      |       | [37] |
| USA     | Cache La Poudre River                        | ND        |      |       | 1.1-5.9    |      | 2.1   | [21] |
| USA     | 139 stream sites                             | Up to 180 |      |       |            |      |       | [20] |
| Germany | River waters and drainages                   | ND-560    | ND   |       |            |      |       | [39] |

|                                    |           |                              |            |      |       |         |    |               |  |
|------------------------------------|-----------|------------------------------|------------|------|-------|---------|----|---------------|--|
|                                    | Australia | Six river systems            | ND-350     | 9    |       |         |    | [48]          |  |
| Tylosin                            | China     | Baiyangdian Lake             | ND-1.88    | ND   | 0.10  | ND      |    | [22]          |  |
|                                    | China     | Streams with livestock farms | ND-5.55    |      |       | ND      |    | [35]          |  |
|                                    | USA       | 139 stream sites             | Up to 280  |      |       |         |    | [20]          |  |
|                                    | USA       | Cache La Poudre River        | 50         |      |       | 1.1-9.3 | 3  | [21]          |  |
|                                    | Italian   | River Po                     | <0.77      |      | <0.77 |         |    | [47]          |  |
|                                    | Italian   | River Arno                   | <0.77      |      | <0.77 |         |    | [47]          |  |
|                                    | Germany   | Watersides in westphalia     | 90 ng/L    |      |       |         |    | [43]          |  |
|                                    | Australia | Six river systems            | ND-60      | 1    |       |         |    | [48]          |  |
| <b>Ionophores</b>                  |           |                              |            |      |       |         |    |               |  |
| Narasin                            | China     | Lake Taihu                   | ND         |      |       | ND-<MQL | ND | In this study |  |
| Salinomycin                        | Australia | Six river systems            | ND-150     | ND   |       |         |    | [48]          |  |
| Monensin                           | Australia | Six river systems            | ND-150     | 2    |       |         |    | [48]          |  |
| <b>Polypeptides</b>                |           |                              |            |      |       |         |    |               |  |
| Bacitracin                         | Australia | Six river systems            | ND         |      |       |         |    | [48]          |  |
| <b>Lincosamides</b>                |           |                              |            |      |       |         |    |               |  |
| Lincomycin                         | China     | Lake Taihu                   | ND-53.8    | 3.00 |       | ND-<MQL | ND | In this study |  |
|                                    | USA       | 139 stream sites             | Up to 730  |      |       |         |    | [20]          |  |
|                                    | Italian   | River Po                     | 3.72-7.47  |      | 5.7   |         |    | [47]          |  |
|                                    | Italian   | River Arno                   | 5.34-10.92 |      | 8.1   |         |    | [47]          |  |
|                                    | Australia | Six river systems            | ND-50      | 1    |       |         |    | [48]          |  |
| Clindamycin                        | Germany   | Watersides in westphalia     | 3-90 ng/L  |      |       |         |    | [43]          |  |
|                                    | Australia | Six river systems            | ND-10      | 1    |       |         |    | [48]          |  |
| <b>Chloramphenicol derivatives</b> |           |                              |            |      |       |         |    |               |  |
| Chloramphenicol                    | China     | Yangze Estuary               | ND-8.63    |      |       |         |    | [24]          |  |
|                                    | China     | Huangpu River                | ND-28.3    |      |       |         |    | [19]          |  |

|                                   |           |                                              |           |      |       |         |    |      |               |
|-----------------------------------|-----------|----------------------------------------------|-----------|------|-------|---------|----|------|---------------|
|                                   | China     | Huangpu River                                | ND-3.9    |      | 0.4   | ND-0.7  |    | 0.3  | [23]          |
|                                   | China     | The Yangtze Estuary and nearby coastal areas |           |      |       | <MQL    |    |      | [25]          |
|                                   | China     | Pearl River                                  | ND-266    |      |       |         |    |      | [26]          |
|                                   | China     | Victoria Harbour                             | ND        |      |       |         |    |      | [26]          |
|                                   | China     | Coastal environment of Dalian                | ND-1.14   | ND   | 0.33  | ND-2.31 | ND | 1.02 | [15]          |
|                                   | Germany   | River waters and drainages                   | ND-60     | ND   |       |         |    |      | [39]          |
| Florfenicol                       | China     | Lake Taihu                                   | ND-963    | ND   |       | ND-<MQL | ND |      | In this study |
|                                   | China     | Yangze Estuary                               | 0.45-89.5 |      |       |         |    |      | [24]          |
|                                   | China     | Huangpu River                                | 6.85-46.6 |      |       |         |    |      | [19]          |
|                                   | China     | Huangpu River                                | ND-241.1  |      | 116.3 | ND-1.3  |    | 0.5  | [23]          |
|                                   | China     | The Yangtze Estuary and nearby coastal areas |           |      |       | <MQL    |    |      | [25]          |
|                                   | China     | Coastal environment of Dalian                | ND-2.27   | 0.51 | 0.53  | ND-1.21 | ND | 0.43 | [15]          |
| Thiampheniol                      | China     | Huangpu River                                | ND-0.6    |      | 0.5   | ND-1.3  |    | 0.4  | [23]          |
| <b><math>\beta</math>-Lactams</b> |           |                                              |           |      |       |         |    |      |               |
| Amoxicillin                       | China     | Pearl River                                  | ND        |      |       |         |    |      | [26]          |
|                                   | China     | Victoria Harbour                             | ND        |      |       |         |    |      | [26]          |
|                                   | Italian   | River Po                                     | <2.08     |      | <2.08 |         |    |      | [47]          |
|                                   | Italian   | River Arno                                   | 3.57-9.91 |      | 5.7   |         |    |      | [47]          |
|                                   | Australia | Six river systems                            | ND-200    | ND   |       |         |    |      | [48]          |
| Cloxacillin                       | Germany   | River waters and drainages                   | ND        | ND   |       |         |    |      | [39]          |
|                                   | Australia | Six river systems                            | ND        |      |       |         |    |      | [48]          |

**Table S11** Statistical analyses on temporal variations of antibiotics in water and sediment of Lake Taihu

| Class              | Water (N=32) <sup>a</sup>                | Sediment (N=30) <sup>a</sup>          |
|--------------------|------------------------------------------|---------------------------------------|
| SAs+TMP            | t=0.154, df=55.096, p=0.878 <sup>b</sup> | <b>Z=-5.352, p=0.000</b> <sup>c</sup> |
| TCs                | Z=-0.433, p=0.665 <sup>c</sup>           | <b>Z=-2.968, p=0.003</b> <sup>c</sup> |
| FQs                | Z=-1.853, p=0.064 <sup>c</sup>           | <b>Z=-3.904, p=0.000</b> <sup>c</sup> |
| MLs                | Z=-0.254, p=0.800 <sup>c</sup>           | <b>Z=-5.590, p=0.000</b> <sup>c</sup> |
| IPs                | ---- <sup>d</sup>                        | --- <sup>d</sup>                      |
| LIN                | <b>Z=-6.847, p=0.000</b> <sup>c</sup>    | --- <sup>d</sup>                      |
| FF                 | <b>Z=-4.639, p=0.000</b> <sup>c</sup>    | --- <sup>d</sup>                      |
| All of antibiotics | Z=-0.900, p=0.368 <sup>c</sup>           | <b>Z=-3.386, p=0.001</b> <sup>c</sup> |

<sup>a</sup> The concentrations of antibiotics were tested by Kolmogorov-Smirnov Test for normal. When  $P > 0.05$ , the distribution of this group of data was normal. When the data were normally distributed, independent t-test was used, and test statistic values and p value were provided. When the data were not normally distributed, Mann Whitney U test was used, and test statistic values and p values were provided. For all the statistical analyses about steroids in water, degrees of freedom are 31; for all the statistical analyses about steroids in sediment, degrees of freedom are 29. When the data with the value less than MQL, a half of MQL was substituted for the value; for the data of ND (not detected, the value less than MDL), a half of MDL was used to run statistical analyses. <sup>b</sup> The data are normally distributed. Independent-samples t-test was used, and test statistic values (t and df) and p value were provided. <sup>c</sup> The data are not normally distributed. Mann Whitney U test was used, and test statistic value Z and p values were provided. <sup>f</sup> Bold means temporal variation is statistically significant ( $P < 0.05$ ). <sup>d</sup> This kind of class of antibiotics were not detected in surface water or sediment of Lake Taihu.

SAs, sulfonamides; TMP, trimethoprim; TCs, tetracyclines; FQs, fluoroquinolones; MLs, macrolides; IPs, polyether ionophores; LIN, lincomycin; FF, florfenicol.

**Table S12** Multiple linear regression analyses for the sediment properties (TOC and texture) and concentrations of antibiotics in the sediments of Lake Taihu

| Class   | May <sup>a</sup> |                                                    | November <sup>a</sup> |                                                    |
|---------|------------------|----------------------------------------------------|-----------------------|----------------------------------------------------|
|         | R <sup>2</sup>   | Significant variable<br>(Standardized Coefficient) | R <sup>2</sup>        | Significant variable<br>(Standardized Coefficient) |
| SAs+TMP | 0.128            | TOC(0.358) <sup>b</sup>                            | --- <sup>c</sup>      | ---                                                |
| TCs     | 0.162            | TOC(0.402)                                         | ---                   | ---                                                |
| FQs     | 0.198            | TOC(0.445)                                         | ---                   | ---                                                |
| MLs     | ---              | ---                                                | ---                   | ---                                                |
| IPs     | ---              | ---                                                | ---                   | ---                                                |
| LIN     | ---              | ---                                                | ---                   | ---                                                |
| FF      | ---              | ---                                                | ---                   | ---                                                |

<sup>a</sup> When the data with the value less than MQL, a half of MQL was substituted for the value; for the data of ND (not detected, the value less than MDL), a half of MDL was used to run statistical analyses. <sup>b</sup> TOC: total organic matter, %; Texture: sand, silt and clay, %. <sup>c</sup>---: multiple linear regression equation fitted was found “not significant”.

SAs, sulfonamides; TMP, trimethoprim; TCs, tetracyclines; FQs, fluoroquinolones; MLs, macrolides; IPs, polyether ionophores; LIN, lincomycin; FF, florfenicol.

## References

1. A. Jelić, M. Petrović and D. Barceló, *Talanta*, 2009, **80**, 363-371.
2. L.-J. Zhou, B.-B. Zhang, Y.-G. Zhao and W. U. Qinglong, *Sci Total Environ*, 2016, DOI: 10.1016/j.scitotenv.2016.03.059.
3. B. Q. Qin, P. Z. Xu, Q. L. Wu, L. C. Luo and Y. L. Zhang, *Hydrobiologia*, 2007, **581**, 3-14.
4. C. S. Y. (Chinese), *Changzhou Statistical Yearbook 2014 (Chinese)*, 2014, [http://www.cztj.gov.cn/html/tjj/2015/OEJCMFCP\\_0113/12154.html](http://www.cztj.gov.cn/html/tjj/2015/OEJCMFCP_0113/12154.html).
5. H. S. Y. (Chinese), *Hangzhou Statistical Yearbook 2014 (Chinese)* 2014, <http://www.hzstats.gov.cn/web/ShowNews.aspx?id=nlmIzcu%2Bjb0=>
6. H. S. Y. (Chinese), *Huzhou Statistical Yearbook 2014 (Chinese)*, 2014, <http://www.hustats.gov.cn/hustats/html/tjn2014/2002.html>.
7. J. S. Y. (Chinese), *Jiaxing Statistical Yearbook 2014 (Chinese)*, 2014, <http://www.jxstats.gov.cn/tjn/Def.asp?cdate=2014>
8. S. S. Y. (Chinese), *Suzhou Statistical Yearbook 2014 (Chinese)*, 2014, <http://www.sztj.gov.cn/tjn/2014/indexch.htm>.
9. W. S. Y. (Chinese), *Wuxi Statistical Yearbook 2014 (Chinese)*, 2014, <http://tj.wuxi.gov.cn/ztl/tjn/index.shtml>.
10. V. K. Balakrishnan, K. A. Terry and J. Toito, *J Chromatogr A*, 2006, **1131**, 1-10.
11. Z. M. Qiang and C. Adams, *Water Res*, 2004, **38**, 2874-2890.
12. A. K. Sarmah, M. T. Meyer and A. B. A. Boxall, *Chemosphere*, 2006, **65**, 725-759.
13. P. Sukul and M. Spiteller, in *Reviews of Environmental Contamination and Toxicology, Vol 187*, ed. G. W. Ware, 2006, vol. 187, pp. 67-101.
14. A. L. Batt, I. B. Bruce and D. S. Aga, *Environ Pollut*, 2006, **142**, 295-302.
15. S. Thiele-Bruhn, *Journal of Plant Nutrition and Soil Science-Zeitschrift Fur Pflanzenernahrung Und Bodenkunde*, 2003, **166**, 145-167.
16. J. Tolls, *Environ Sci Technol*, 2001, **35**, 3397-3406.
17. Y. Pico and V. Andreu, *Anal Bioanal Chem*, 2007, **387**, 1287-1299.
18. N. Watanabe, B. A. Bergamaschi, K. A. Loftin, M. T. Meyer and T. Harter, *Environ Sci Technol*, 2010, **44**, 6591-6600.
19. M. Hansen, E. Bjorklund, K. A. Krogh and B. Halling-Sorensen, *Trac-Trend Anal Chem*, 2009, **28**, 521-533.
20. E. P. Company, *NADA*, 1989.
21. A. B. A. Boxall, P. Johnson, E. J. Smith, C. J. Sinclair, E. Stutt and L. S. Levy, *J Agr Food Chem*, 2006, **54**, 2288-2297.
22. B. Q. Qin, *Springer*, 2008, 1-36, 152-174.
23. X. N. Lei, J. J. Lu, Z. L. Liu, Y. B. Tong and S. M. Li, *Environ Sci Pollut R*, 2015, **22**, 1670-1678.
24. G. S. Na, X. D. Fang, Y. Q. Cai, L. K. Ge, H. M. Zong, X. T. Yuan, Z. W. Yao and Z. F. Zhang, *Mar Pollut Bull*, 2013, **69**, 233-237.
25. Y. Bai, W. Meng, J. Xu, Y. Zhang and C. Guo, *Environmental Science-Processes & Impacts*, 2014, **16**, 586-593.
26. J. Xu, Y. Zhang, C. B. Zhou, C. S. Guo, D. M. Wang, P. Du, Y. Luo, J. Wan and W. Meng, *Sci Total Environ*, 2014, **497**, 267-273.
27. J. Tang, T. Z. Shi, X. W. Wu, H. Q. Cao, X. D. Li, R. M. Hua, F. Tang and Y. D. Yue, *Chemosphere*,

- 2015, **122**, 154-161.
28. L. Jiang, X. Hu, D. Yin, H. Zhang and Z. Yu, *Chemosphere*, 2011, **82**, 822-828.
  29. D. W. Kolpin, E. T. Furlong, M. T. Meyer, E. M. Thurman, S. D. Zaugg, L. B. Barber and H. T. Buxton, *Environ Sci Technol*, 2002, **36**, 1202-1211.
  30. S. C. Kim and K. Carlson, *Environ Sci Technol*, 2007, **41**, 50-57.
  31. W. H. Li, Y. L. Shi, L. H. Gao, J. M. Liu and Y. Q. Cai, *Chemosphere*, 2012, **89**, 1307-1315.
  32. K. Chen and J. L. Zhou, *Chemosphere*, 2014, **95**, 604-612.
  33. C. X. Yan, Y. Yang, J. L. Zhou, M. Liu, M. H. Nie, H. Shi and L. J. Gu, *Environ Pollut*, 2013, **175**, 22-29.
  34. H. Shi, Y. Yang, M. Liu, C. X. Yan, H. Y. Yue and J. L. Zhou, *Mar Pollut Bull*, 2014, **83**, 317-323.
  35. W. H. Xu, G. Zhang, X. D. Li, S. C. Zou, P. Li, Z. H. Hu and J. Li, *Water Res*, 2007, **41**, 4526-4534.
  36. J.-F. Yang, G.-G. Ying, J.-L. Zhao, R. Tao, H.-C. Su and Y.-S. Liu, *J Environ Sci Heal B*, 2011, **46**, 272-280.
  37. X. M. Liang, B. W. Chen, X. P. Nie, Z. Shi, X. P. Huang and X. D. Li, *Chemosphere*, 2013, **92**, 1410-1416.
  38. J.-F. Yang, G.-G. Ying, J.-L. Zhao, R. Tao, H.-C. Su and F. Chen, *The Science of the total environment*, 2010, **408**, 3424-3432.
  39. L. Tong, S. Huang, Y. Wang, H. Liu and M. Li, *Sci Total Environ*, 2014, **497**, 180-187.
  40. L. H. Gao, Y. L. Shi, W. H. Li, J. M. Liu and Y. Q. Cai, *J Environ Monitor*, 2012, **14**, 1248-1255.
  41. R. J. Zhang, G. Zhang, Q. Zheng, J. H. Tang, Y. J. Chen, W. H. Xu, Y. D. Zou and X. X. Chen, *Ecotox Environ Safe*, 2012, **80**, 208-215.
  42. X. Zhang, D. Zhang, H. Zhang, Z. Luo and C. Yan, *Environ Sci Pollut R*, 2012, **19**, 1392-1404.
  43. L.-J. Zhou, G.-G. Ying, J.-L. Zhao, J.-F. Yang, L. Wang, B. Yang and S. Liu, *Environ Pollut*, 2011, **159**, 1877-1885.
  44. L.-J. Zhou, G.-G. Ying, S. Liu, R.-Q. Zhang, H.-J. Lai, Z.-F. Chen and C.-G. Pan, *Sci Total Environ*, 2013, **444**, 183-195.
  45. A. Murata, H. Takada, K. Mutoh, H. Hosoda, A. Harada and N. Nakada, *Sci Total Environ*, 2011, **409**, 5305-5312.
  46. S. Managaki, A. Murata, H. Takada, B. C. Tuyen and N. H. Chiem, *Environ Sci Technol*, 2007, **41**, 8004-8010.
  47. F. Tamtam, F. Mercier, B. Le Bot, J. Eurin, Q. T. Dinh, M. Clement and M. Chevreuil, *Sci Total Environ*, 2008, **393**, 84-95.
  48. R. Hirsch, T. Ternes, K. Haberer and K. L. Kratz, *Sci Total Environ*, 1999, **225**, 109-118.
  49. W. H. Xu, G. Zhang, S. C. Zou, Z. H. Ling, G. L. Wang and W. Yan, *Water Environ Res*, 2009, **81**, 248-254.
  50. D. Ashton, M. Hilton and K. V. Thomas, *Sci Total Environ*, 2004, **333**, 167-184.
  51. J. Feitosa-Felizzola and S. Chiron, *J Hydrol*, 2009, **364**, 50-57.
  52. T. Christian, R. J. Schneider, H. A. Farber, D. Skutlarek, M. T. Meyer and H. E. Goldbach, *Acta Hydroch Hydrob*, 2003, **31**, 36-44.
  53. V. Osorio, R. Marce, S. Perez, A. Ginebreda, J. L. Cortina and D. Barcelo, *The Science of the total environment*, 2012, **440**, 3-13.
  54. A. Ginebreda, I. Muñoz, M. L. de Alda, R. Brix, J. López-Doval and D. Barceló, *Environ Int*, 2010, **36**, 153-162.
  55. D. Bendz, N. A. Paxeus, T. R. Ginn and F. J. Loge, *J Hazard Mater*, 2005, **122**, 195-204.

56. E. Zuccato, S. Castiglioni, R. Bagnati, M. Melis and R. Fanelli, *J Hazard Mater*, 2010, **179**, 1042-1048.
57. A. J. Watkinson, E. J. Murby, D. W. Kolpin and S. D. Costanzo, *Sci Total Environ*, 2009, **407**, 2711-2723.
58. K. V. Thomas and M. J. Hilton, *Mar Pollut Bull*, 2004, **49**, 436-444.
59. D. M. Cheng, X. H. Liu, L. Wang, W. W. Gong, G. N. Liu, W. J. Fu and M. Cheng, *Sci Total Environ*, 2014, **476**, 266-275.
60. Y. Matsui, T. Ozu, T. Inoue and T. Matsushita, *Desalination*, 2008, **226**, 215-221.
